# Supplementary material for: LC–MS-based absolute metabolite quantification: application to metabolic flux measurement in trypanosomes
Source: PubMed Central journal article supplement (PMC4605981; doi:10.1007/s11306-015-0827-2), 2015-07-09

## SUPPLEMENTARY INFORMATION

### **LC-MS-based absolute metabolite quantification: Application to metabolic flux measurement in trypanosomes**

Dong-Hyun Kim<sup>1,2</sup>, Fiona Achcar<sup>1</sup>, Rainer Breitling<sup>3</sup>, Karl E. Burgess<sup>4</sup>, Michael P. Barrett<sup>1,4\*</sup>

<sup>1</sup>Wellcome Trust Centre for Molecular Parasitology, Institute of Infection, Immunity and Inflammation, College of Medical Veterinary and Life Sciences, University of Glasgow, G12 8TA, UK

<sup>2</sup>Current: Centre for Analytical Bioscience, School of Pharmacy, University of Nottingham, University Park, Nottingham, NG7 2RD, UK

<sup>3</sup>Manchester Centre of Synthetic Biology for Fine and Speciality Chemicals, Manchester Institute of Biotechnology, Faculty of Life Sciences, University of Manchester, Manchester, M1 7DN, UK.

<sup>4</sup>Glasgow Polyomics, Wolfson Wohl Cancer Research Centre, College of Medical Veterinary & Life Sciences, University of Glasgow, G61 1QH, UK

\*Address for Correspondence:

M.P. Barrett, Wellcome Trust Centre for Molecular Parasitology, Institute of Infection, Immunity and Inflammation, College of Medical Veterinary and Life Sciences, University of Glasgow, G12 8TA, UK

E-mail: Michael.Barrett@glasgow.ac.uk

Tel: +44 (0) 141 330 6904. Fax: +44 (0) 141 330 4077

4-Trimethylammoniobutanoate (+)

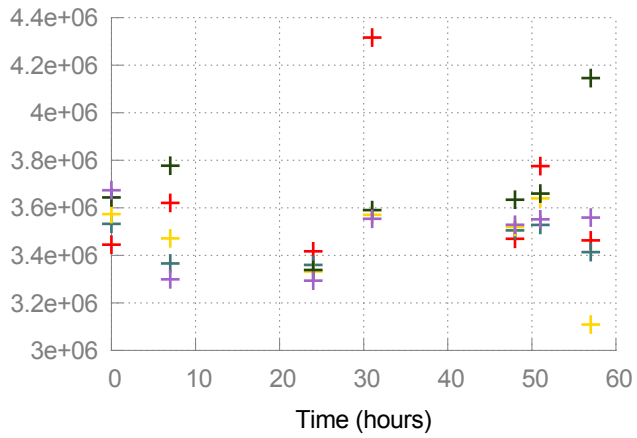

5'-Methylthioadenosine (+)

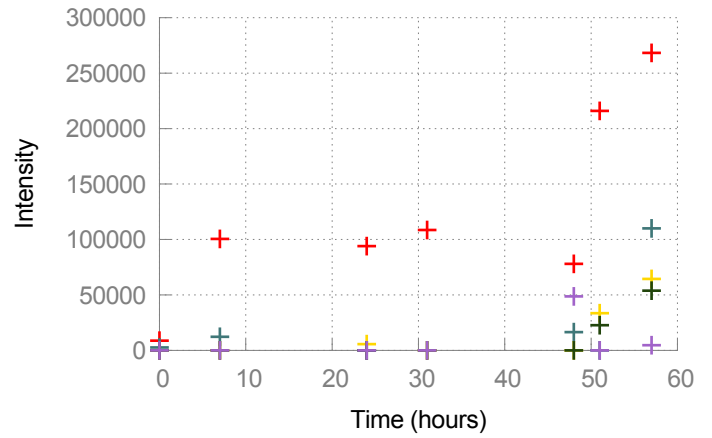

5-Oxoproline (+)

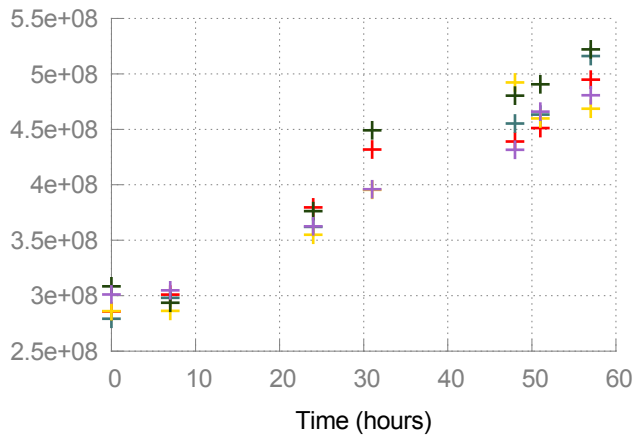

acetylcysteine (+)

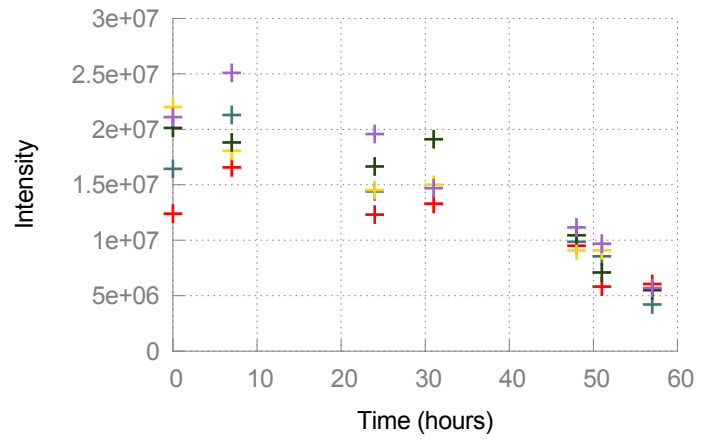

Adenine (+)

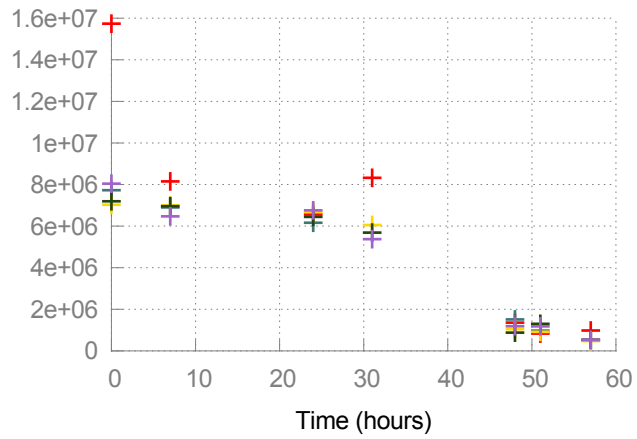

Adenosine (+)

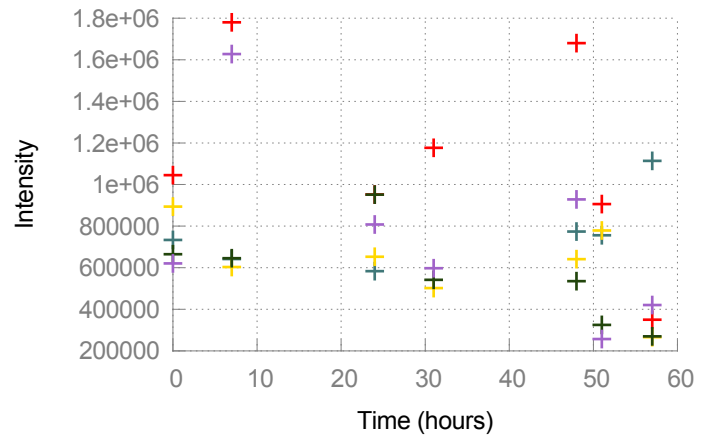

Ala-Gly (+)

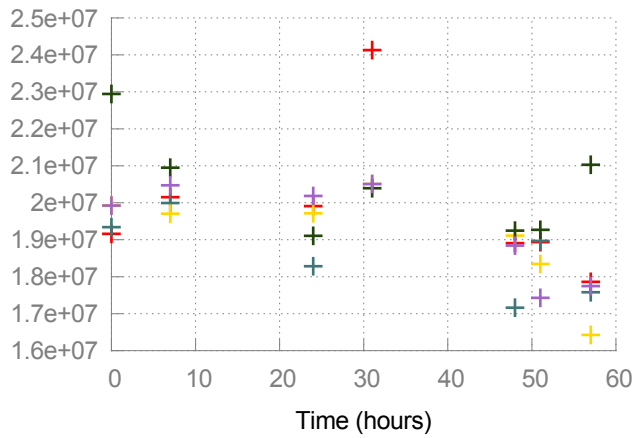

Betaine (+)

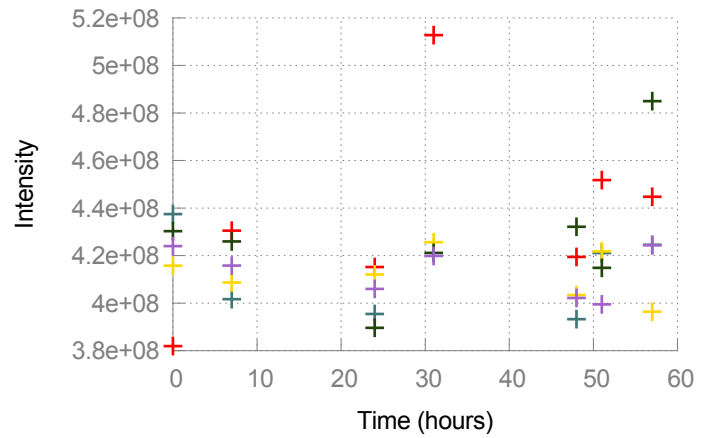

Creatinine (+)

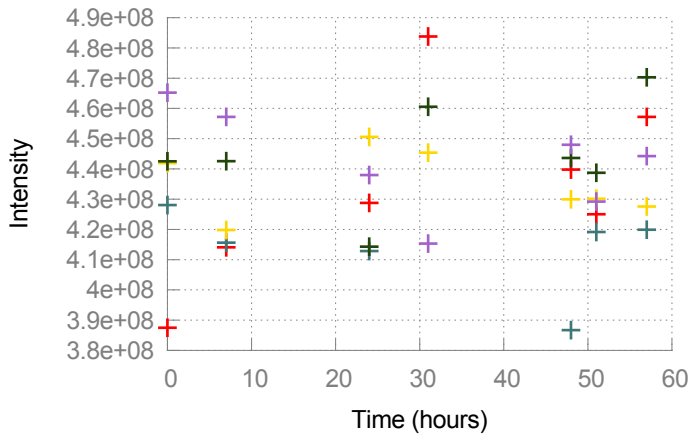

Cytidine (+)

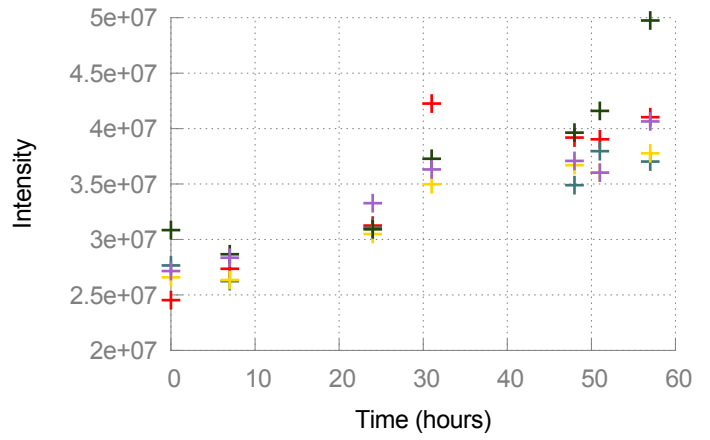

Guanine (+)

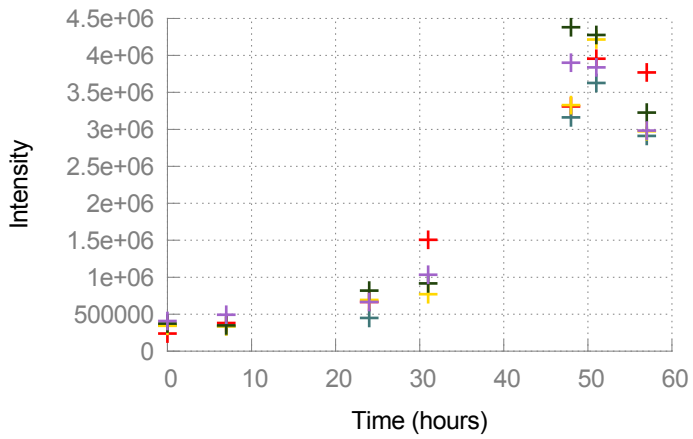

Guanosine (+)

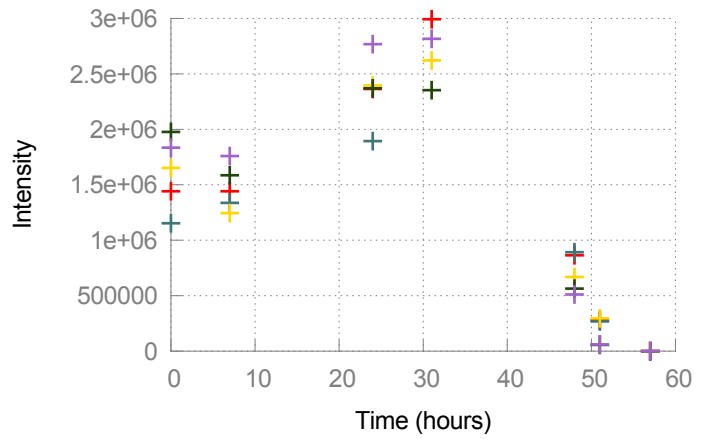

Imidazole-4-acetate (+)

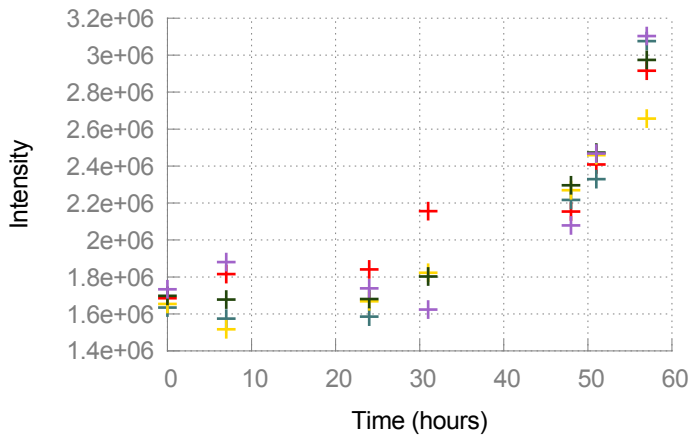

Nicotinic acid (+)

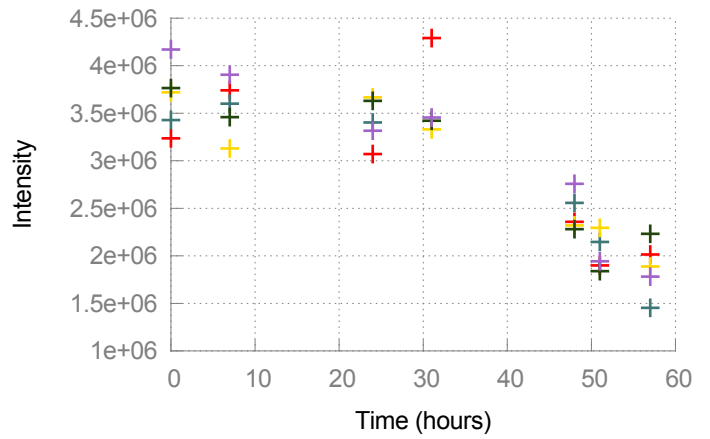

L-Carnitine (+)

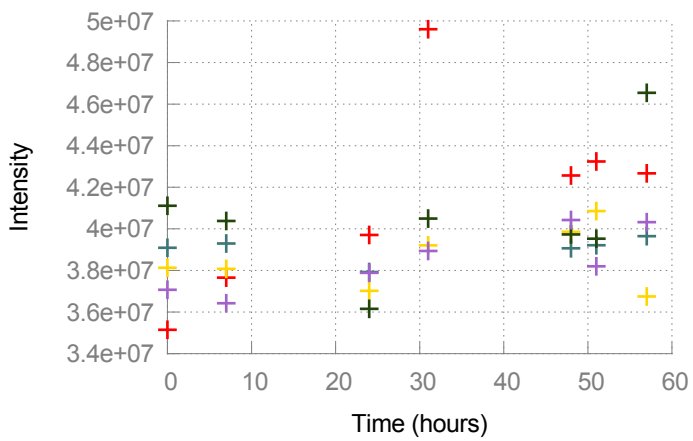

L-cysteine (+)

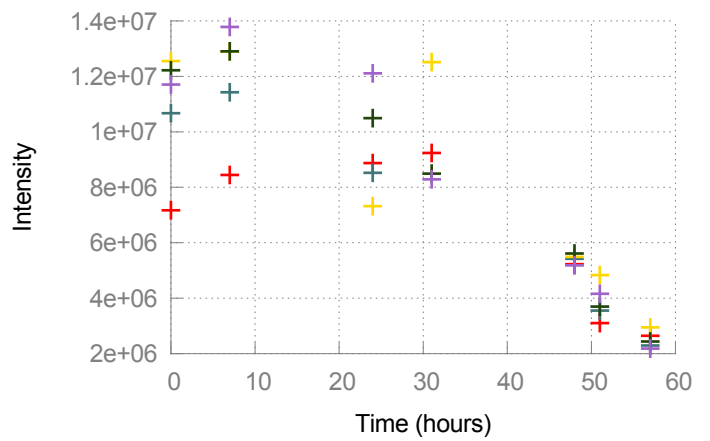

L-Kynurenine (+)

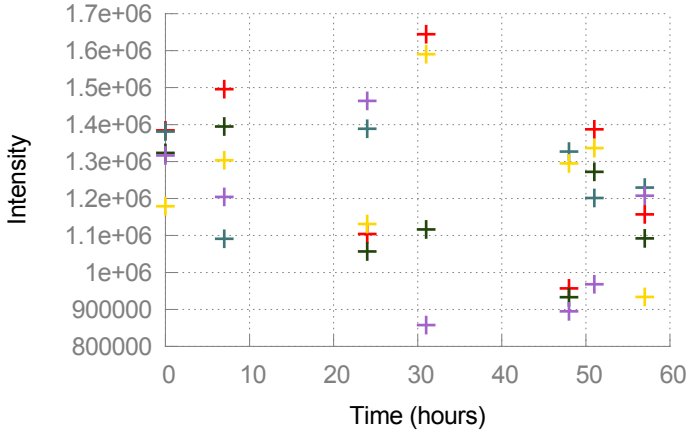

Methylcysteine (+)

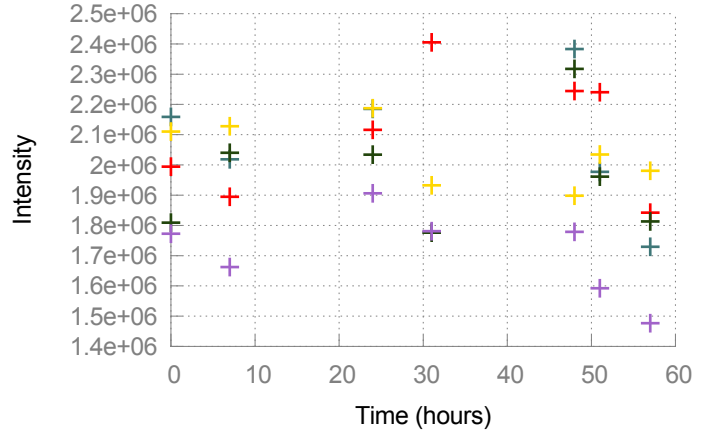

N-Acetyl-D-glucosamine (+)

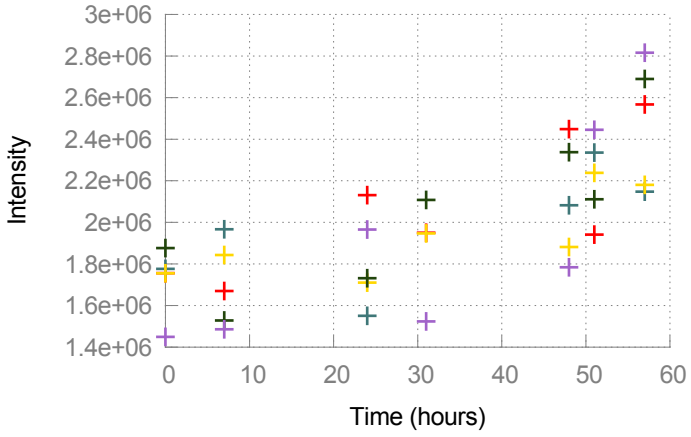

Nicotinamide (+)

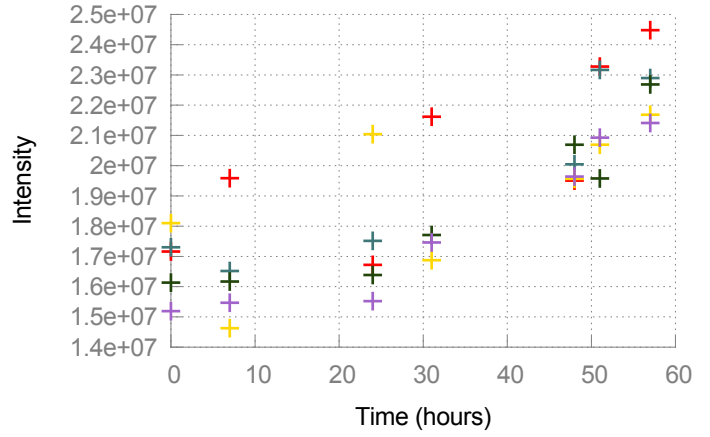

O-Acetylcarnitine (+)

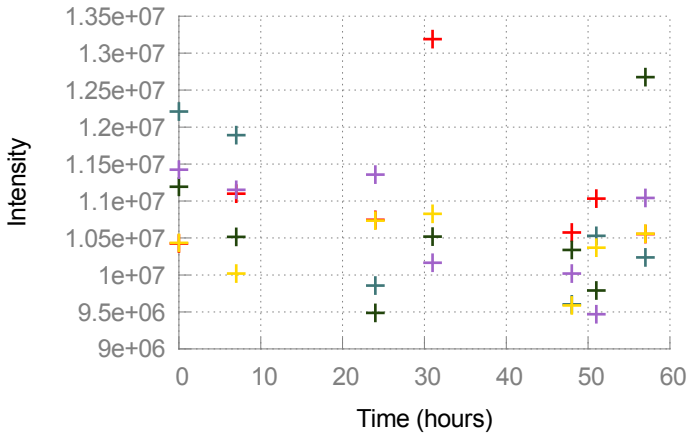

Uracil (+)

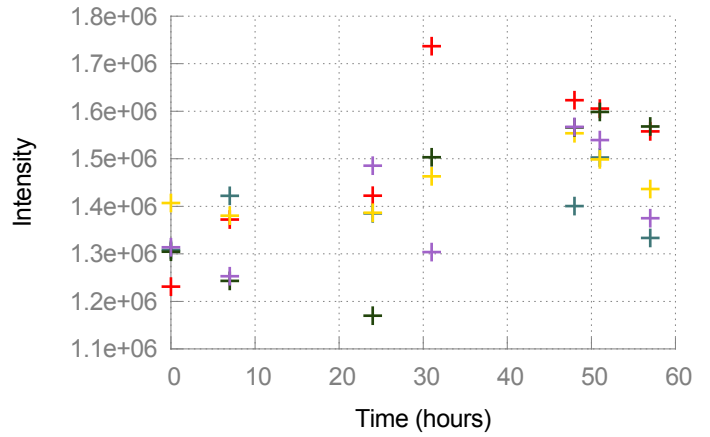

O-Acetyl-L-serine (+)

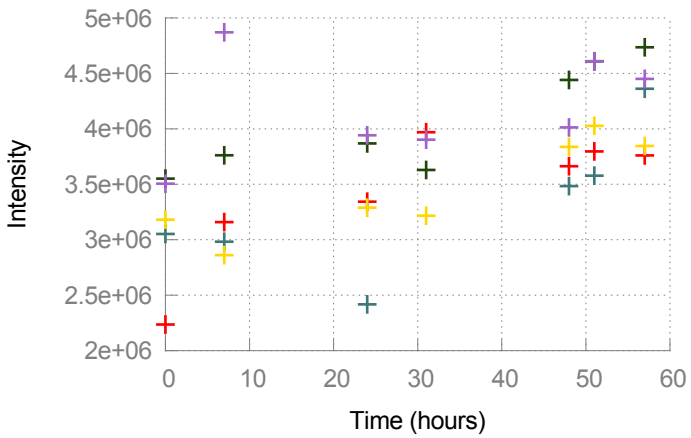

Pyridoxine (+)

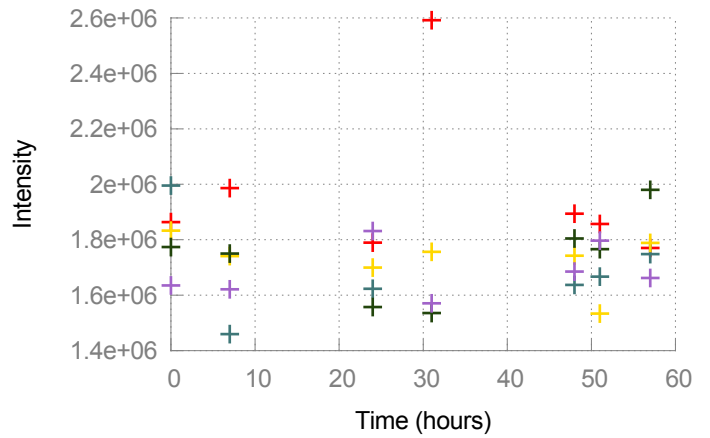

sn-glycero-3-Phosphocholine (+)

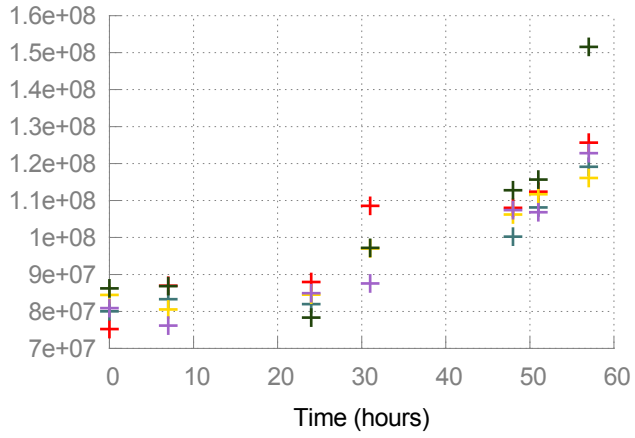

thymine (+)

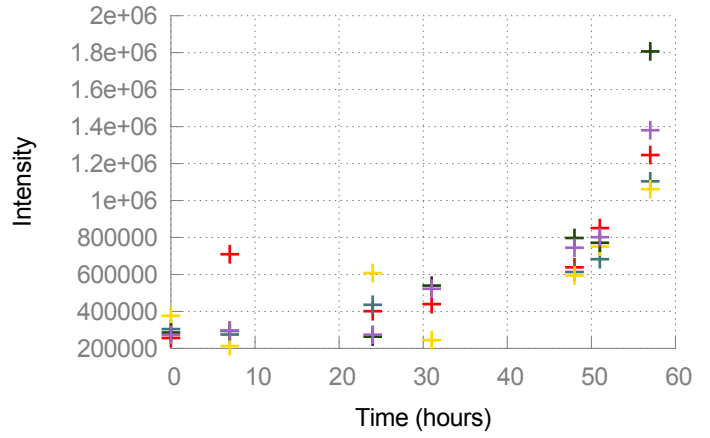

trans-4-Hydroxy-L-proline (+)

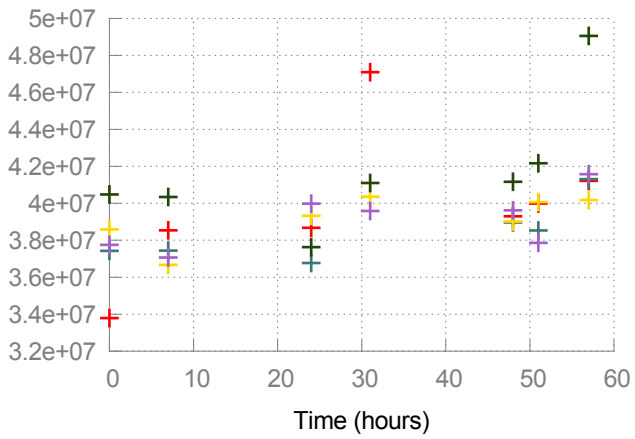

(R)-2-Hydroxyglutarate (-)

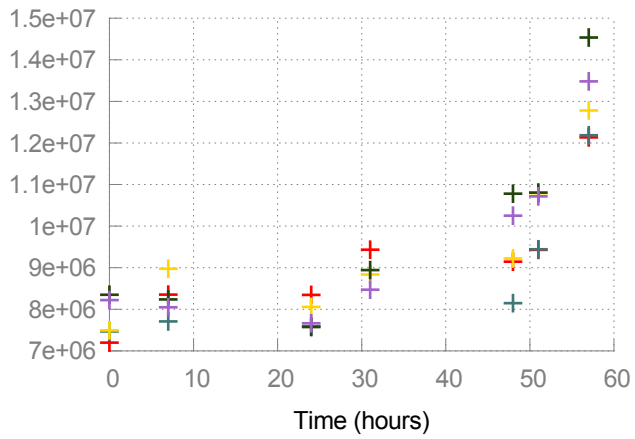

(S)-Malate (-)

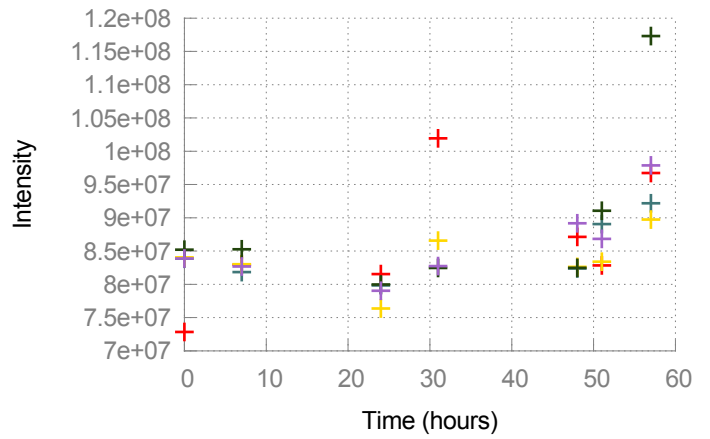

allantoin (-)

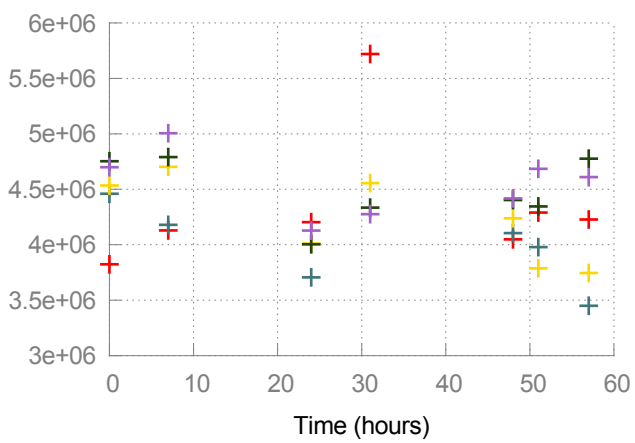

Benzoate (-)

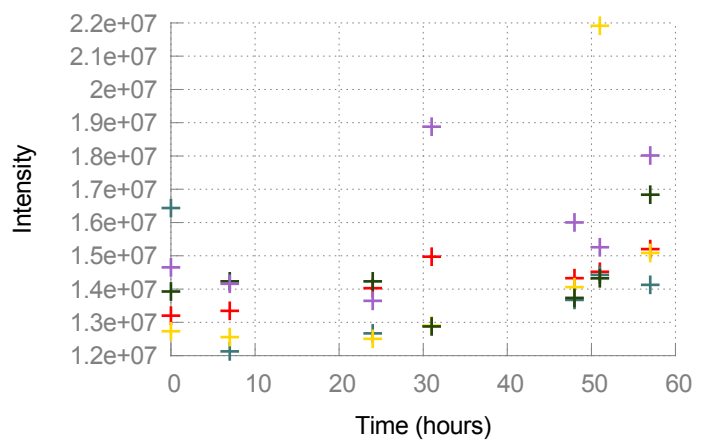

D-Galactarate (-)

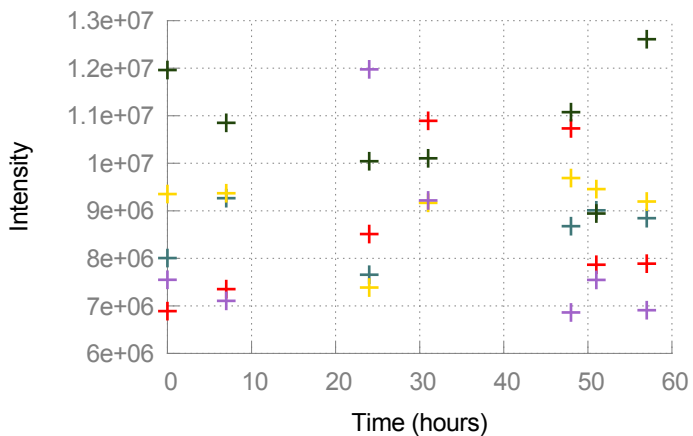

D-Glucono-1,4-lactone (-)

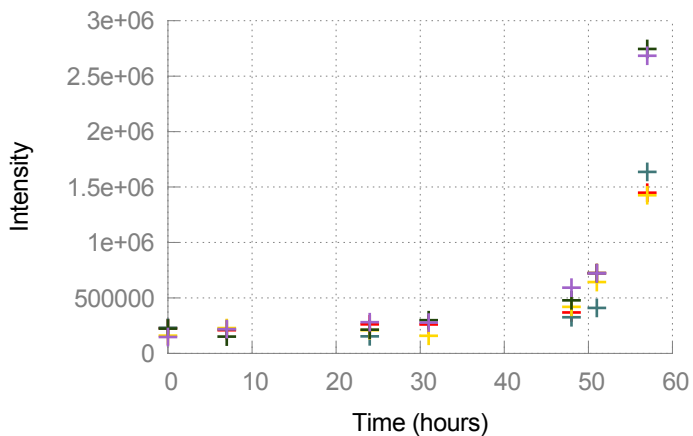

D-Glucuronolactone (-)

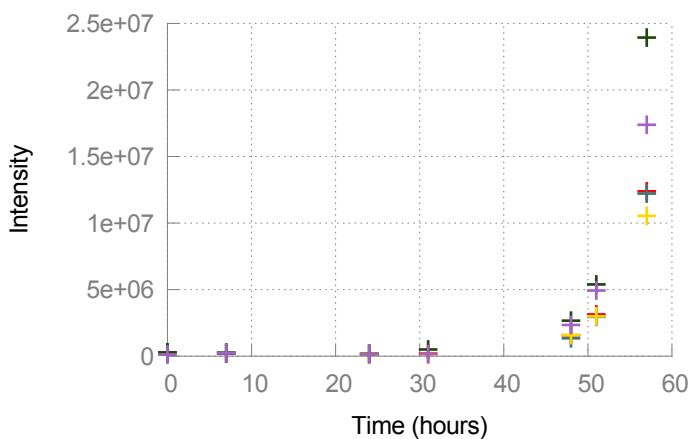

D-Ribose (-)

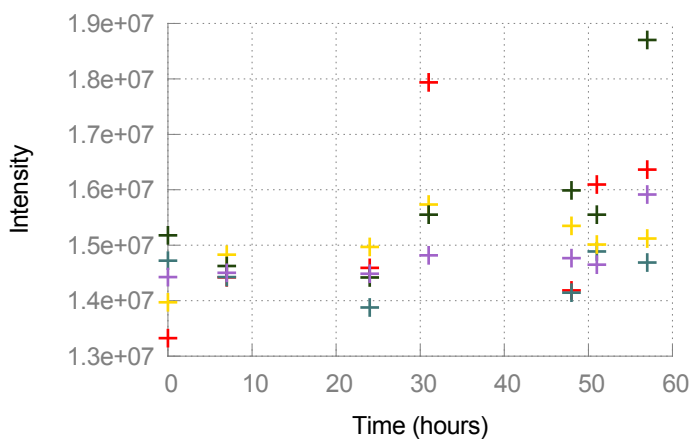

Fumarate (-)

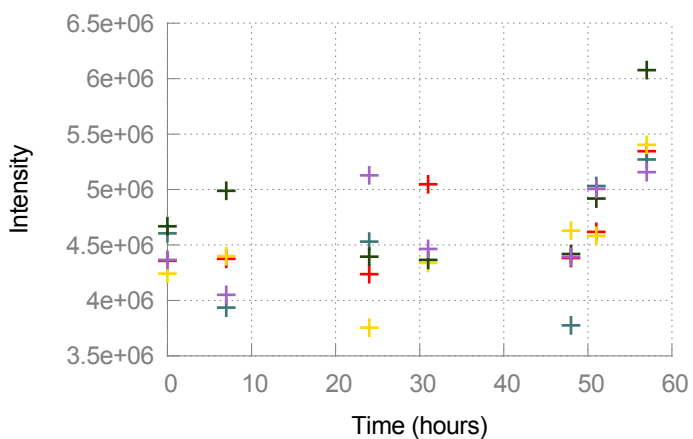

Itaconate (-)

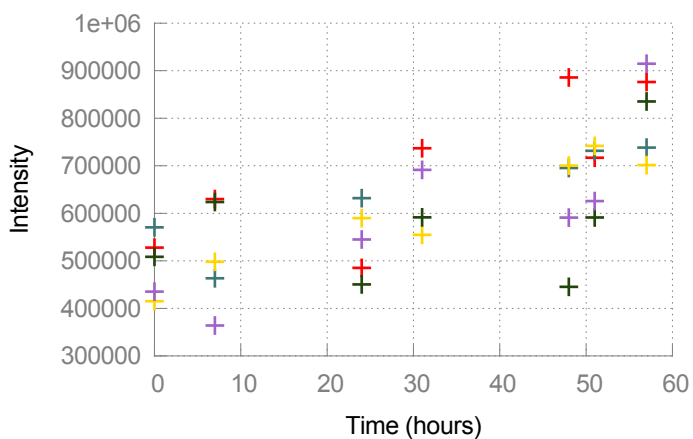

L-Gulono-1,4-lactone (-)

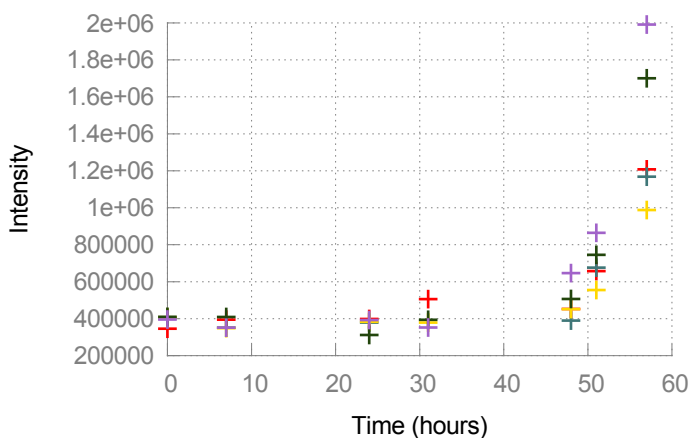

Maleic acid (-)

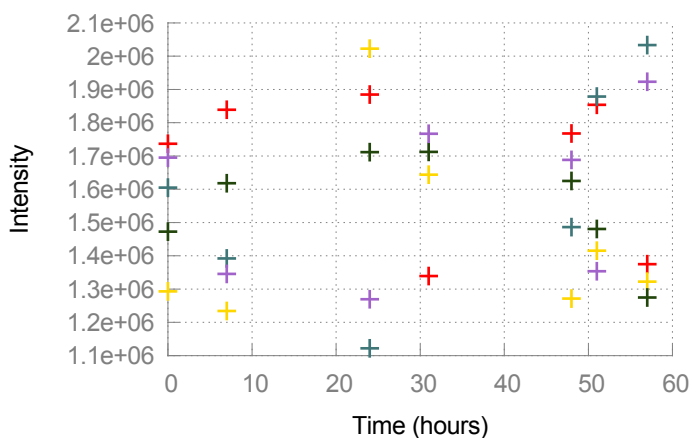

Malonate (-)

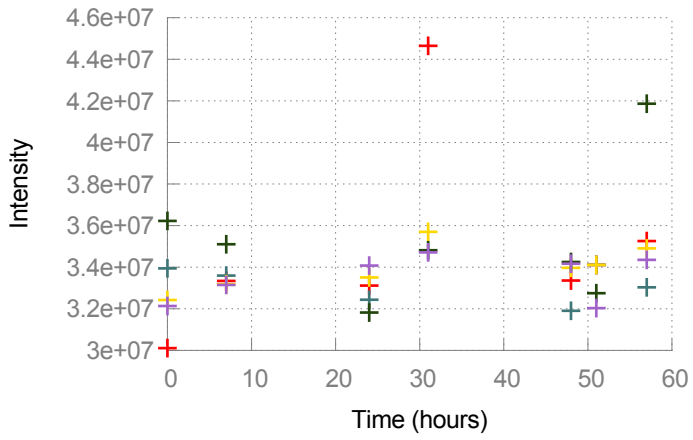

Mesaconate (-)

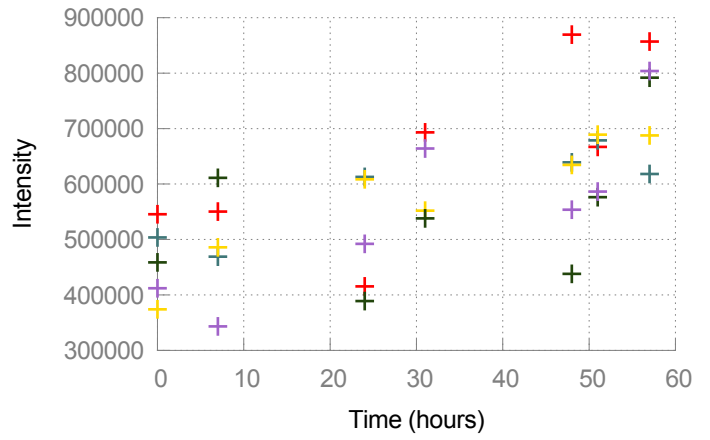

N-Acetylneuraminate (-)

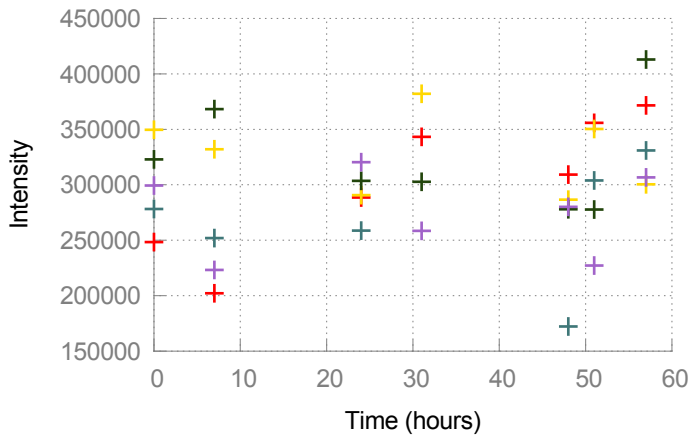

Orotate (-)

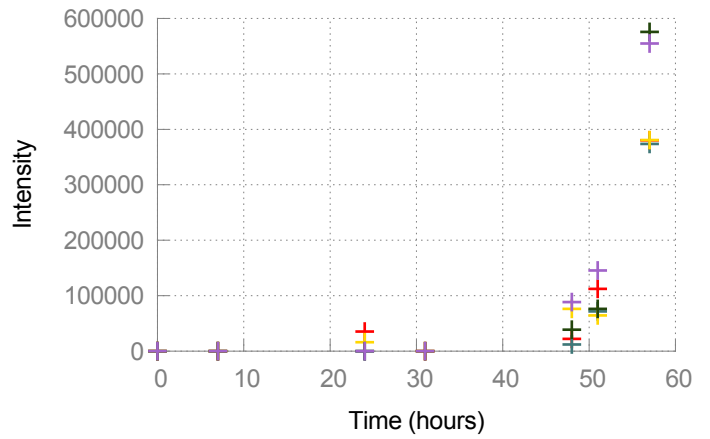

Oxalate (-)

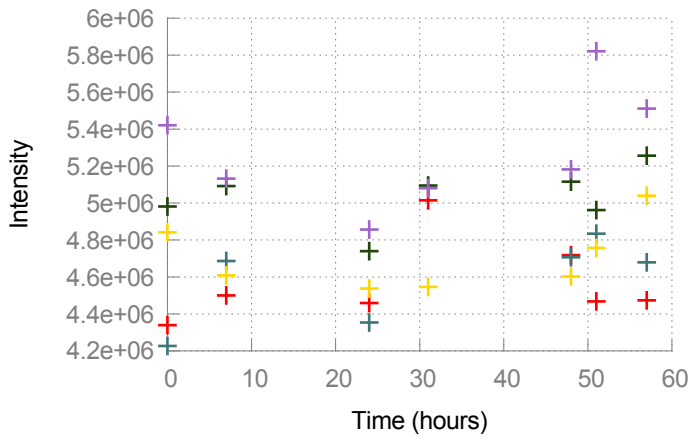

Phenylpyruvate (-)

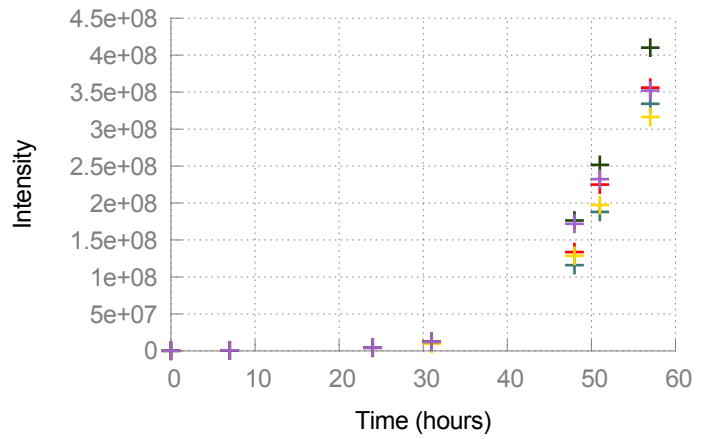

sn-Glycerol 3-phosphate (-)

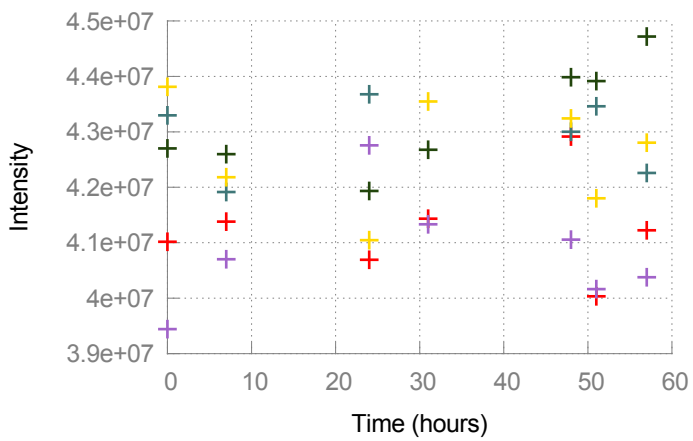

sucrose (-)

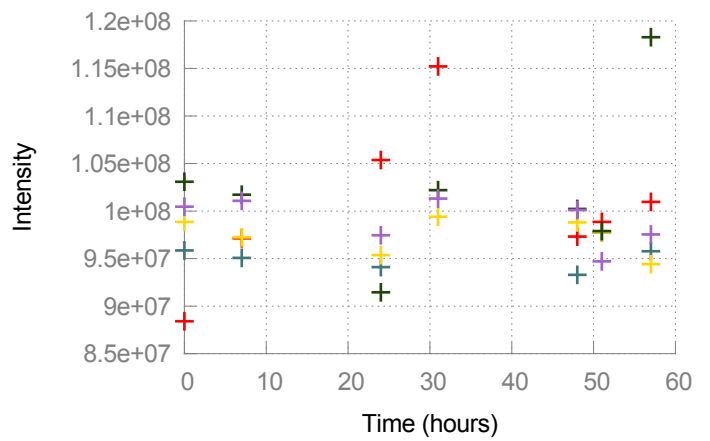

Supplement: 11306_2015_827_MOESM5_ESM.pdf [file 11306_2015_827_MOESM5_ESM.pdf]
