# Supplementary material for: LC–MS-based absolute metabolite quantification: application to metabolic flux measurement in trypanosomes
Source: PubMed Central journal article supplement (PMC4605981; doi:10.1007/s11306-015-0827-2), 2015-07-09
Supplement: 11306_2015_827_MOESM1_ESM.pdf [file 11306_2015_827_MOESM1_ESM.pdf]

## SUPPLEMENTARY INFORMATION

### **LC-MS-based absolute metabolite quantification: Application to metabolic flux measurement in trypanosomes**

Dong-Hyun Kim<sup>1,2</sup>, Fiona Achcar<sup>1</sup>, Rainer Breitling<sup>3</sup>, Karl E. Burgess<sup>4</sup>, Michael P. Barrett<sup>1,4\*</sup>

<sup>1</sup>Wellcome Trust Centre for Molecular Parasitology, Institute of Infection, Immunity and Inflammation, College of Medical Veterinary and Life Sciences, University of Glasgow, G12 8TA, UK

<sup>2</sup>Current: Centre for Analytical Bioscience, School of Pharmacy, University of Nottingham, University Park, Nottingham, NG7 2RD, UK

<sup>3</sup>Manchester Centre of Synthetic Biology for Fine and Speciality Chemicals, Manchester Institute of Biotechnology, Faculty of Life Sciences, University of Manchester, Manchester, M1 7DN, UK.

<sup>4</sup>Glasgow Polyomics, Wolfson Wohl Cancer Research Centre, College of Medical Veterinary & Life Sciences, University of Glasgow, G61 1QH, UK

\*Address for Correspondence:

M.P. Barrett, Wellcome Trust Centre for Molecular Parasitology, Institute of Infection, Immunity and Inflammation, College of Medical Veterinary and Life Sciences, University of Glasgow, G12 8TA, UK

E-mail: Michael.Barrett@glasgow.ac.uk

Tel: +44 (0) 141 330 6904. Fax: +44 (0) 141 330 4077

```

## load required packages

library(mzmatch.R)
mzmatch.init(15000)

##Functions
xsetFunction <- function (i)
{
    require (mzmatch.R)
    mzmatch.init ()
    PeakML.xcms.write.SingleMeasurement(xsets[[i]], filename=outputfilenames[i],ionisation='detect',addscans=0,ppm=5,writeRejected=FALSE,ApodisationFilter=TRUE)
}

## Organising experimental data set

setwd ('INPUT_DIR')

mzXMLfiles.fullnames <- dir(full.names=TRUE,pattern='\\.mzXML$',recursive=TRUE)
mzXMLfiles.shortnames <- dir(full.names=FALSE,pattern='\\.mzXML$',recursive=TRUE)
outputfilenames <- paste(sub('.mzXML', '', mzXMLfiles.fullnames), '.peakml', sep=")

# Extracting peaks with centWave algorithm from XCMS

xseto <- xcmsSet(mzXMLfiles.fullnames, method='centWave', ppm=2, peakwidth=c(10,100), snthresh=5, prefilter=c(3,1000), integrate=1, mzdiff=0.01, verbose.columns=TRUE, fitgauss=FALSE,nSlaves=4)

# RT correction to disable for isotope labelling studies
if(T==T){
    #xset2<-retcor(xseto, method='obiwarp', profStep=0.01, center=1)
    xset2<-retcor(xseto, method='obiwarp', profStep=0.01)
    print('RT correction done\n')
}else{
    xset2 <- xseto
}

## Write out peaks as single peakml files
xsets <- split (xset2,xset2@filepaths)

cl <- makeCluster (4)
clusterExport (cl,list=c('xsetFunction','xsets','outputfilenames','mzXMLfiles.fullnames'))
system.time(clusterApply(cl,1:length(mzXMLfiles.fullnames),xsetFunction))
stopCluster(cl)

MainClasses <- dir ()

```

```

if(T){
  ## Combine biological replicates
  dir.create ('combined')
  NoReplicates=c()
  for (i in 1:length(MainClasses))
  {
    FILESp <- dir(MainClasses[i],full.names=TRUE,pattern=\\.peakml$,recursive=TRUE)
    OUTPUTf <- paste('combined/',MainClasses[i],'.peakml',sep='')
    mzmatch.ipeak.Combine(
      i=paste(FILESp, collapse=','), v=T, rtwindow=60,
      o=OUTPUTf, combination='set',
      ppm=5, label=paste(MainClasses[i], sep='')
    )
    NoReplicates=append(NoReplicates, length(FILESp[i])==1)
  }

  print('Check one of the file in combined/ if pics are correctly aligned. If not run rt correction')

  ## RSD filtering
  dir.create ('combined_RSD_filtered')
  dir.create ('combined_RSD_rejected')
  FILESp <- dir ('combined',full.names=TRUE)
  FILESp <- dir ('combined',pattern=\\.peakml$)
  for (i in 1:length(FILESp))
  {
    outputf=paste('combined_RSD_filtered/', FILESp[i], sep='')
    if(NoReplicates[i]){
      file.copy(FILESp[i], outputf)
    }else{
      mzmatch.ipeak.filter.RSDFilter(
        i=FILESp[i],
        o=outputf,
        rejected=paste('combined_RSD_rejected/',FILESp[i],sep=''),
        rsd=0.3, v=T
      )
    }
  }

  ## Combine by conditions
  INPUTDIR <- 'combined_RSD_filtered'
  FILESp <- dir (INPUTDIR,full.names=TRUE,pattern=\\.peakml$)
  mzmatch.ipeak.Combine(
    i=paste(FILESp,collapse=','), v=T, rtwindow=30,
    o='final_combined.peakml', combination='set', ppm=5
  )
}

```

```

}else{
  # Combining
  FILESF <- dir(full.names=TRUE, pattern=\\.peakml$)
  mzmatch.ipeak.Combine(i=paste(FILESF, collapse=','), v=T, rtwindow=30, o='final_combined.peakml', combination='set', ppm=5)
}

## Filtering
mzmatch.ipeak.filter.NoiseFilter (i='final_combined.peakml',o='combined_nf.peakml',v=T, codadw=0.5)
mzmatch.ipeak.filter.SimpleFilter(i='combined_nf.peakml', o='combined_sf1.peakml', mindetections=1, v=T)
mzmatch.ipeak.filter.SimpleFilter(i='combined_sf1.peakml', o='combined_sf2.peakml', minintensity=1000, v=T)
#mzmatch.ipeak.filter.SimpleFilter(i='combined_sf1.peakml', o='combined_sf2.peakml', minintensity=10000, v=T)

## Gap Filler
PeakML.GapFiller(filename = 'combined_sf2.peakml', ionisation = 'detect', outputfile = 'combined_gapfilled.peakml', ppm = 0, rtwin = 0, fillAll=TRUE,Rawpath='INPUT_DIR')

# Remove repeating group IDs
PeakML.FilterPeakGroups(filename = 'combined_gapfilled.peakml', ionisation = 'detect', outputfile = 'combined_cleaned.peakml', ppm = 5, rtwin = 15, Rawpath='INPUT_DIR')

## Match related peaks

mzmatch.ipeak.sort.RelatedPeaks(
  i='combined_cleaned.peakml', v=T,
  o='final_combined_related.peakml',
  basepeaks='final_combined_basepeaks.peakml',
  ppm=5, rtwindow=30,
  JHeapSize=15000
)

## Identify peaks from data bases

DBS <- dir( paste(.find.package('mzmatch.R'), '/dbs', sep=), full.names=TRUE)

DBS <- paste(DBS[c(1,2,3,4,7,8,9,11,13)],collapse=',')
mzmatch.ipeak.util.Identify(
  i='final_combined_related.peakml', v=T,
  o='final_combined_related_identified.peakml',
  ppm=5, databases=DBS,
  JHeapSize=15000
)
mzmatch.ipeak.util.Identify(
  i='final_combined_basepeaks.peakml', v=T,
  o='final_combined_basepeaks_identified.peakml',

```

```
ppm=5, databases=DBS,  
JHeapSize=15000  
)
```

```
PeakML.Isotope.TargettedIsotopes(  
  baseDir='INPUT_DIR',  
  molFormulaFile='list_of_metabolites_file.tab',  
  outFile='output_file',  
  mzXMLSrc='INPUT_DIR',  
  useArea =TRUE,  
  peakMLFile='final_combined_related_identified.peakml',  
  label=1,  
  fillGaps='ALLPEAKS',  
)
```
