# Supplementary material for: LC–MS-based absolute metabolite quantification: application to metabolic flux measurement in trypanosomes
Source: PubMed Central journal article supplement (PMC4605981; doi:10.1007/s11306-015-0827-2), 2015-07-09
Supplement: 11306_2015_827_MOESM2_ESM.pdf [file 11306_2015_827_MOESM2_ESM.pdf]

## SUPPLEMENTARY INFORMATION

### **LC-MS-based absolute metabolite quantification: Application to metabolic flux measurement in trypanosomes**

Dong-Hyun Kim<sup>1,2</sup>, Fiona Achcar<sup>1</sup>, Rainer Breitling<sup>3</sup>, Karl E. Burgess<sup>4</sup>, Michael P. Barrett<sup>1,4\*</sup>

<sup>1</sup>Wellcome Trust Centre for Molecular Parasitology, Institute of Infection, Immunity and Inflammation, College of Medical Veterinary and Life Sciences, University of Glasgow, G12 8TA, UK

<sup>2</sup>Current: Centre for Analytical Bioscience, School of Pharmacy, University of Nottingham, University Park, Nottingham, NG7 2RD, UK

<sup>3</sup>Manchester Centre of Synthetic Biology for Fine and Speciality Chemicals, Manchester Institute of Biotechnology, Faculty of Life Sciences, University of Manchester, Manchester, M1 7DN, UK.

<sup>4</sup>Glasgow Polyomics, Wolfson Wohl Cancer Research Centre, College of Medical Veterinary & Life Sciences, University of Glasgow, G61 1QH, UK

\*Address for Correspondence:

M.P. Barrett, Wellcome Trust Centre for Molecular Parasitology, Institute of Infection, Immunity and Inflammation, College of Medical Veterinary and Life Sciences, University of Glasgow, G12 8TA, UK

E-mail: Michael.Barrett@glasgow.ac.uk

Tel: +44 (0) 141 330 6904. Fax: +44 (0) 141 330 4077

| Group 1                     | Mass     | Group 2                     | Mass     | Group 3                   | Mass     |
|-----------------------------|----------|-----------------------------|----------|---------------------------|----------|
| Glycine                     | 75.0320  | Imidazole                   | 68.0374  | Methylguanidine           | 73.0640  |
| Pyruvate                    | 88.0161  | methylglyoxal               | 72.0211  | L-Alanine                 | 89.0477  |
| Putrescine                  | 88.1000  | Glyoxylate                  | 74.0004  | 4-Aminobutanoate          | 103.0633 |
| beta-Alanine                | 89.0477  | glycolate                   | 76.0160  | Choline                   | 104.1070 |
| Glycerol                    | 92.0473  | glyceraldehyde              | 90.0317  | cytosine                  | 111.0433 |
| L-Serine                    | 105.0426 | 2-oxobutanoate              | 102.0317 | Uracil                    | 112.0273 |
| L-Proline                   | 115.0633 | Malonate                    | 104.0110 | L-homoserine              | 119.0582 |
| L-Valine                    | 117.0790 | (R)-3-Hydroxybutanoate      | 104.0474 | Nicotinamide              | 122.0480 |
| L-2,4-Diaminobutanoate      | 118.0742 | Fumarate                    | 116.0110 | Picolinic acid            | 123.0320 |
| L-Threonine                 | 119.0582 | Methylmalonate              | 118.0266 | thymine                   | 126.0429 |
| Nicotinate                  | 123.0321 | D-Erythrose                 | 120.0423 | 5-Oxoproline              | 129.0426 |
| Taurine                     | 125.0147 | Oxaloacetate                | 132.0059 | agmatine                  | 130.1218 |
| Imidazole-4-acetate         | 126.0429 | Deoxyribose                 | 134.0579 | L-isoleucine              | 131.0946 |
| trans-4-Hydroxy-L-proline   | 131.0582 | Adenine                     | 135.0545 | L-Ornithine               | 132.0899 |
| L-Leucine                   | 131.0946 | L-Glutamate                 | 147.0532 | Methylcysteine            | 135.0354 |
| L-Asparagine                | 132.0535 | (R)-2-Hydroxyglutarate      | 148.0372 | L-Carnitine               | 162.1125 |
| L-Aspartate                 | 133.0295 | Xanthine                    | 152.0334 | Pyridoxal                 | 167.0582 |
| 4-Aminobenzoate             | 137.0477 | 3-Hydroxyphenylacetate      | 152.0473 | N(pi)-Methyl-L-histidine  | 169.0851 |
| Ethanolamine phosphate      | 141.0191 | Orotate                     | 156.0171 | N-Acetylornithine         | 174.1004 |
| Spermidine                  | 145.1579 | L-Rhamnose                  | 164.0685 | L-Tyrosine                | 181.0739 |
| L-Glutamine                 | 146.0691 | Phosphoenolpyruvate         | 167.9824 | Choline phosphate         | 184.0739 |
| L-Lysine                    | 146.1055 | cis-Aconitate               | 174.0164 | Spermine                  | 202.2157 |
| L-Methionine                | 149.0511 | D-glucose                   | 180.0634 | L-Kynurenine              | 208.0848 |
| Guanine                     | 151.0494 | D-Gluconic acid             | 196.0583 | Pantothenate              | 219.1107 |
| 2-Phenylglycine             | 151.0633 | 2-Methylcitrate             | 206.0426 | L-Cystathionine           | 222.0674 |
| L-Histidine                 | 155.0695 | D-Galactarate               | 210.0376 | Deoxyadenosine            | 251.1018 |
| Pyridoxine                  | 169.0739 | D-ribose 5-phosphate        | 230.0192 | D-Glucosamine 6-phosphate | 259.0457 |
| L-Dehydroascorbate          | 174.0164 | L-Cystine                   | 240.0238 | Adenosine                 | 267.0967 |
| L-Arginine                  | 174.1117 | Uridine                     | 244.0695 | Guanosine                 | 283.0917 |
| L-Citrulline                | 175.0957 | Pyridoxal phosphate         | 247.0246 | dCMP                      | 307.0569 |
| D-Glucosamine               | 179.0794 | D-glucose 6-phosphate       | 260.0297 | 5'-Methylthioadenosine    | 313.0845 |
| L-Phenylalanine             | 179.0946 | 2,3-Bisphospho-D-glycerate  | 265.9593 | dAMP                      | 331.0682 |
| N2-Acetyl-L-lysine          | 188.1161 | 6-Phospho-D-gluconate       | 276.0246 | AMP                       | 347.0631 |
| Selenomethionine            | 196.9955 | UMP                         | 324.0359 | Folate                    | 441.1397 |
| L-Tryptophan                | 204.0899 | 3',5'-Cyclic AMP            | 329.0525 | NAD+                      | 664.1164 |
| N-Acetyl-D-glucosamine      | 221.0899 | D-Fructose 1,6-bisphosphate | 339.9961 | Trypanothione disulfide   | 721.2888 |
| Deoxyuridine                | 228.0746 | Maltose                     | 342.1162 | FAD                       | 785.1571 |
| Thymidine                   | 242.0903 | IMP                         | 348.0471 |                           |          |
| Cytidine                    | 243.0855 | CMP                         | 375.9349 |                           |          |
| sn-glycero-3-Phosphocholine | 258.1101 | Thiamin diphosphate         | 425.0450 |                           |          |
| Thiamin                     | 265.1123 | ADP                         | 427.0294 |                           |          |
| Inosine                     | 268.0808 | IDP                         | 428.0134 |                           |          |
| dGMP                        | 347.0631 | CoA                         | 767.1152 |                           |          |
| S-Adenosyl-L-methionine     | 399.1451 |                             |          |                           |          |

| <b>Group 4</b>                | <b>Mass</b> | <b>Group 5</b>               | <b>Mass</b> |
|-------------------------------|-------------|------------------------------|-------------|
| 1,3-Diaminopropane            | 74.0844     | (R)-Lactate                  | 90.0317     |
| Oxalate                       | 89.9953     | Glycerate                    | 106.0266    |
| Succinate semialdehyde        | 102.0317    | Maleic acid                  | 116.0110    |
| Succinate                     | 118.0266    | 3-Methyl-2-oxobutanoic acid  | 116.0473    |
| D-Threose                     | 120.0423    | L-cysteine                   | 121.0197    |
| (S)-Malate                    | 134.0215    | Mesaconate                   | 130.0266    |
| Hypoxanthine                  | 136.0385    | 5-Aminolevulinate            | 131.0582    |
| 2-Oxoglutarate                | 146.0215    | L-Homocysteine               | 135.0354    |
| D-Ribose                      | 150.0528    | Ectoine                      | 142.0742    |
| Allantoin                     | 158.0440    | Acetylcholine                | 146.1176    |
| Phenylpyruvate                | 164.0473    | O-Acetyl-L-serine            | 147.0532    |
| 2-Deoxy-D-glucose             | 164.0685    | (S)-Dihydroorotate           | 158.0328    |
| DL-Glyceraldehyde 3-phosphate | 169.9980    | acetylcysteine               | 163.0303    |
| sn-Glycerol 3-phosphate       | 172.0137    | L-Methionine S-oxide         | 165.0460    |
| D-Glucuronolactone            | 176.0321    | ascorbate                    | 176.0321    |
| 3-(4-Hydroxyphenyl)pyruvate   | 180.0423    | D-Glucono-1,4-lactone        | 178.0477    |
| 3-Phospho-D-glycerate         | 185.9929    | D-Fructose                   | 180.0634    |
| N-Acetylglutamine             | 188.0797    | 2-phospho-D-glycerate        | 185.9929    |
| Citrate                       | 192.0270    | N6-Acetyl-L-Lysine           | 188.1161    |
| Phenylacetyl glycine          | 193.0739    | N-acetyl-L-glutamate         | 189.0637    |
| D-Erythrose 4-phosphate       | 200.0086    | O-Acetylcarnitine            | 204.1230    |
| Orotidine                     | 288.0594    | Biotin                       | 244.0882    |
| dUMP                          | 308.0410    | gamma-L-Glutamyl-L-cysteine  | 250.0623    |
| 2'-Deoxyinosine 5'-phosphate  | 332.0522    | D-Fructose 6-phosphate       | 260.0297    |
| GMP                           | 363.0580    | Deoxyguanosine               | 267.0967    |
| S-Adenosyl-L-homocysteine     | 384.1216    | Homocystine                  | 268.0551    |
| dGDP                          | 427.0294    | Glutathione                  | 307.0838    |
| GDP                           | 443.0243    | UDP                          | 404.0022    |
| FMN                           | 456.1046    | Adenosine 2',5'-bisphosphate | 427.0294    |
| CTP                           | 482.9845    | UTP                          | 483.9685    |
| ATP                           | 506.9958    | NADH                         | 665.1248    |
| GTP                           | 522.9907    | trypanothione                | 723.3044    |
| UDP-glucose                   | 566.0550    | NADP                         | 743.0754    |
| NADP+                         | 743.0754    | Acetyl-CoA                   | 809.1258    |
