# Supplementary material for: LC–MS-based absolute metabolite quantification: application to metabolic flux measurement in trypanosomes
Source: PubMed Central journal article supplement (PMC4605981; doi:10.1007/s11306-015-0827-2), 2015-07-09
Supplement: 11306_2015_827_MOESM3_ESM.pdf [file 11306_2015_827_MOESM3_ESM.pdf]

## SUPPLEMENTARY INFORMATION

### **LC-MS-based absolute metabolite quantification: Application to metabolic flux measurement in trypanosomes**

Dong-Hyun Kim<sup>1,2</sup>, Fiona Achcar<sup>1</sup>, Rainer Breitling<sup>3</sup>, Karl E. Burgess<sup>4</sup>, Michael P. Barrett<sup>1,4\*</sup>

<sup>1</sup>Wellcome Trust Centre for Molecular Parasitology, Institute of Infection, Immunity and Inflammation, College of Medical Veterinary and Life Sciences, University of Glasgow, G12 8TA, UK

<sup>2</sup>Current: Centre for Analytical Bioscience, School of Pharmacy, University of Nottingham, University Park, Nottingham, NG7 2RD, UK

<sup>3</sup>Manchester Centre of Synthetic Biology for Fine and Speciality Chemicals, Manchester Institute of Biotechnology, Faculty of Life Sciences, University of Manchester, Manchester, M1 7DN, UK.

<sup>4</sup>Glasgow Polyomics, Wolfson Wohl Cancer Research Centre, College of Medical Veterinary & Life Sciences, University of Glasgow, G61 1QH, UK

\*Address for Correspondence:

M.P. Barrett, Wellcome Trust Centre for Molecular Parasitology, Institute of Infection, Immunity and Inflammation, College of Medical Veterinary and Life Sciences, University of Glasgow, G12 8TA, UK

E-mail: Michael.Barrett@glasgow.ac.uk

Tel: +44 (0) 141 330 6904. Fax: +44 (0) 141 330 4077

|    | Mass     | RT    | Formula     | Putative metabolite                      | Map                   | PubChem ID       |
|----|----------|-------|-------------|------------------------------------------|-----------------------|------------------|
| 1  | 189.0822 | 8.20  | C8H15NO2S   | Prenyl-L-cysteine                        | Amino Acid Metabolism | PubChem:25200435 |
| 2  | 121.0196 | 15.67 | C3H7NO2S    | L-Cysteine                               | Amino Acid Metabolism | PubChem:5862     |
| 3  | 297.0897 | 8.38  | C11H15N5O3S | 5'-Methylthioadenosine                   | Amino Acid Metabolism | PubChem:439176   |
| 4  | 103.0633 | 13.98 | C4H9NO2     | N,N-Dimethylglycine                      | Amino Acid Metabolism | PubChem:673      |
| 5  | 139.0745 | 12.38 | C6H9N3O     | L-Histidinal                             | Amino Acid Metabolism | PubChem:57339283 |
| 6  | 88.1000  | 27.15 | C4H12N2     | Putrescine                               | Amino Acid Metabolism | PubChem:1045     |
| 7  | 117.0539 | 12.02 | C3H7N3O2    | Guanidinoacetate                         | Amino Acid Metabolism | PubChem:763      |
| 8  | 118.0742 | 22.72 | C4H10N2O2   | L-2,4-Diaminobutanoate                   | Amino Acid Metabolism | PubChem:6971272  |
| 9  | 161.0689 | 12.73 | C6H11NO4    | O-Acetyl-L-homoserine                    | Amino Acid Metabolism | PubChem:25244888 |
| 10 | 145.1579 | 37.43 | C7H19N3     | Spermidine                               | Amino Acid Metabolism | PubChem:1102     |
| 11 | 73.0528  | 10.28 | C3H7NO      | Aminoacetone                             | Amino Acid Metabolism | PubChem:215      |
| 12 | 75.0320  | 17.13 | C2H5NO2     | Glycine                                  | Amino Acid Metabolism | PubChem:750      |
| 13 | 89.0476  | 16.29 | C3H7NO2     | L-Alanine                                | Amino Acid Metabolism | PubChem:5950     |
| 14 | 102.0317 | 17.37 | C4H6O3      | 2-Oxobutanoate                           | Amino Acid Metabolism | PubChem:3593277  |
| 15 | 103.0633 | 16.88 | C4H9NO2     | 4-Aminobutanoate                         | Amino Acid Metabolism | PubChem:5460232  |
| 16 | 103.0997 | 19.94 | C5H13NO     | Choline                                  | Amino Acid Metabolism | PubChem:305      |
| 17 | 105.0426 | 17.30 | C3H7NO3     | L-Serine                                 | Amino Acid Metabolism | PubChem:5951     |
| 18 | 111.9926 | 16.33 | CH5O4P      | Hydroxymethylphosphonate                 | Amino Acid Metabolism | PubChem:21680357 |
| 19 | 115.0633 | 13.89 | C5H9NO2     | L-Proline                                | Amino Acid Metabolism | PubChem:145742   |
| 20 | 116.0473 | 16.54 | C5H8O3      | 3-Methyl-2-oxobutanoic acid              | Amino Acid Metabolism | PubChem:49       |
| 21 | 117.0790 | 12.07 | C5H11NO2    | Betaine                                  | Amino Acid Metabolism | PubChem:247      |
| 22 | 117.0790 | 13.22 | C5H11NO2    | L-Valine                                 | Amino Acid Metabolism | PubChem:6287     |
| 23 | 119.0583 | 15.97 | C4H9NO3     | L-Threonine                              | Amino Acid Metabolism | PubChem:6288     |
| 24 | 126.1156 | 13.97 | C7H14N2     | 1-5-diazabicyclononane                   | Amino Acid Metabolism | PubChem:25203381 |
| 25 | 127.0633 | 7.32  | C6H9NO2     | 2,3,4,5-Tetrahydropyridine-2-carboxylate | Amino Acid Metabolism | PubChem:3765     |
| 26 | 128.0950 | 13.38 | C6H12N2O    | L-Lysine 1,6-lactam                      | Amino Acid Metabolism | PubChem:440599   |
| 27 | 129.0426 | 11.72 | C5H7NO3     | L-1-Pyrroline-3-hydroxy-5-carboxylate    | Amino Acid Metabolism | PubChem:11966267 |
| 28 | 129.0790 | 26.03 | C6H11NO2    | L-Pipecolate                             | Amino Acid Metabolism | PubChem:6931663  |
| 29 | 129.0790 | 7.01  | C6H11NO2    | N4-Acetylaminobutanal                    | Amino Acid Metabolism | PubChem:440850   |
| 30 | 129.0902 | 27.57 | C5H11N3O    | 4-Guanidinobutanal                       | Amino Acid Metabolism | PubChem:25200663 |
| 31 | 130.1106 | 21.40 | C6H14N2O    | N-Acetylputrescine                       | Amino Acid Metabolism | PubChem:122356   |

|    | Mass     | RT    | Formula   | Putative metabolite                   | Map                   | PubChem ID       |
|----|----------|-------|-----------|---------------------------------------|-----------------------|------------------|
| 32 | 131.0582 | 15.43 | C5H9NO3   | L-Glutamate 5-semialdehyde            | Amino Acid Metabolism | PubChem:193305   |
| 33 | 131.0946 | 11.66 | C6H13NO2  | L-Leucine                             | Amino Acid Metabolism | PubChem:6106     |
| 34 | 132.0423 | 7.01  | C5H8O4    | (S)-2-Acetolactate                    | Amino Acid Metabolism | PubChem:440878   |
| 35 | 132.0898 | 24.34 | C5H12N2O2 | L-Ornithine                           | Amino Acid Metabolism | PubChem:6262     |
| 36 | 133.0374 | 16.76 | C4H7NO4   | L-Aspartate                           | Amino Acid Metabolism | PubChem:5960     |
| 37 | 135.0354 | 14.41 | C4H9NO2S  | L-Homocysteine                        | Amino Acid Metabolism | PubChem:91552    |
| 38 | 142.0741 | 14.27 | C6H10N2O2 | Ectoine                               | Amino Acid Metabolism | PubChem:126041   |
| 39 | 144.1262 | 20.15 | C7H16N2O  | 1-(3-aminopropyl)-4-aminobutanal      | Amino Acid Metabolism | PubChem:19913541 |
| 40 | 145.0375 | 12.02 | C5H7NO4   | 2-Oxoglutaramate                      | Amino Acid Metabolism | PubChem:48       |
| 41 | 145.0853 | 16.57 | C5H11N3O2 | 4-Guanidinobutanoate                  | Amino Acid Metabolism | PubChem:500      |
| 42 | 145.1102 | 10.77 | C7H15NO2  | 3-Dehydroxycarnitine                  | Amino Acid Metabolism | PubChem:725      |
| 43 | 146.0693 | 16.54 | C5H10N2O3 | L-Glutamine                           | Amino Acid Metabolism | PubChem:5961     |
| 44 | 146.1055 | 25.92 | C6H14N2O2 | L-Lysine                              | Amino Acid Metabolism | PubChem:5962     |
| 45 | 147.0532 | 16.47 | C5H9NO4   | L-Glutamate                           | Amino Acid Metabolism | PubChem:33032    |
| 46 | 147.0532 | 12.15 | C5H9NO4   | O-Acetyl-L-serine                     | Amino Acid Metabolism | PubChem:99478    |
| 47 | 148.0371 | 16.95 | C5H8O5    | (R)-2-Hydroxyglutarate                | Amino Acid Metabolism | PubChem:5460200  |
| 48 | 149.0511 | 12.70 | C5H11NO2S | L-Methionine                          | Amino Acid Metabolism | PubChem:6137     |
| 49 | 154.0377 | 11.74 | C6H6N2O3  | Imidazol-5-yl-pyruvate                | Amino Acid Metabolism | PubChem:23615390 |
| 50 | 155.0695 | 16.51 | C6H9N3O2  | L-Histidine                           | Amino Acid Metabolism | PubChem:6274     |
| 51 | 156.0536 | 12.85 | C6H8N2O3  | 4-Imidazolone-5-propanoate            | Amino Acid Metabolism | PubChem:128      |
| 52 | 159.0895 | 6.97  | C7H13NO3  | 5-Acetamidopentanoate                 | Amino Acid Metabolism | PubChem:439903   |
| 53 | 160.0370 | 16.50 | C6H8O5    | 2-Oxadipate                           | Amino Acid Metabolism | PubChem:71       |
| 54 | 160.0848 | 12.86 | C6H12N2O3 | D-Alanyl-D-alanine                    | Amino Acid Metabolism | PubChem:5460362  |
| 55 | 160.1211 | 23.63 | C7H16N2O2 | N6-Methyl-L-lysine                    | Amino Acid Metabolism | PubChem:164795   |
| 56 | 161.1051 | 14.52 | C7H15NO3  | L-Carnitine                           | Amino Acid Metabolism | PubChem:10917    |
| 57 | 164.0474 | 4.49  | C9H8O3    | Phenylpyruvate                        | Amino Acid Metabolism | PubChem:997      |
| 58 | 165.0460 | 15.00 | C5H11NO3S | L-Methionine S-oxide                  | Amino Acid Metabolism | PubChem:847      |
| 59 | 165.0790 | 11.14 | C9H11NO2  | L-Phenylalanine                       | Amino Acid Metabolism | PubChem:6140     |
| 60 | 166.0630 | 4.64  | C9H10O3   | 3-Methoxy-4-hydroxyphenylacetaldehyde | Amino Acid Metabolism | PubChem:151276   |
| 61 | 166.0630 | 6.83  | C9H10O3   | 3-(3-Hydroxy-phenyl)-propanoic acid   | Amino Acid Metabolism | PubChem:91       |
| 62 | 173.0687 | 14.76 | C7H11NO4  | N-Acetyl-L-glutamate 5-semialdehyde   | Amino Acid Metabolism | PubChem:192878   |
| 63 | 173.0800 | 15.52 | C6H11N3O3 | 5-Guanidino-2-oxopentanoate           | Amino Acid Metabolism | PubChem:25244978 |

|    | Mass     | RT    | Formula     | Putative metabolite                     | Map                                   | PubChem ID       |
|----|----------|-------|-------------|-----------------------------------------|---------------------------------------|------------------|
| 64 | 174.1003 | 17.24 | C7H14N2O3   | N-Acetylmethionine                      | Amino Acid Metabolism                 | PubChem:439232   |
| 65 | 174.1117 | 27.54 | C6H14N4O2   | L-Arginine                              | Amino Acid Metabolism                 | PubChem:6322     |
| 66 | 175.0956 | 16.89 | C6H13N3O3   | L-Citrulline                            | Amino Acid Metabolism                 | PubChem:9750     |
| 67 | 176.0684 | 14.18 | C7H12O5     | (2S)-2-Isopropylmalate                  | Amino Acid Metabolism                 | PubChem:5280523  |
| 68 | 180.0423 | 7.93  | C9H8O4      | 3-(4-Hydroxyphenyl)pyruvate             | Amino Acid Metabolism                 | PubChem:979      |
| 69 | 181.0740 | 14.31 | C9H11NO3    | L-Tyrosine                              | Amino Acid Metabolism                 | PubChem:6057     |
| 70 | 182.0580 | 9.73  | C9H10O4     | 3-(4-Hydroxyphenyl)lactate              | Amino Acid Metabolism                 | PubChem:9378     |
| 71 | 188.1162 | 16.53 | C8H16N2O3   | N6-Acetyl-L-lysine                      | Amino Acid Metabolism                 | PubChem:92832    |
| 72 | 188.1525 | 23.43 | C9H20N2O2   | N6,N6,N6-Trimethyl-L-lysine             | Amino Acid Metabolism                 | PubChem:6992003  |
| 73 | 192.0634 | 16.36 | C7H12O6     | Quinate                                 | Amino Acid Metabolism                 | PubChem:6508     |
| 74 | 195.0892 | 4.86  | C10H13NO3   | L-Tyrosine methyl ester                 | Amino Acid Metabolism                 | PubChem:70652    |
| 75 | 203.0795 | 14.87 | C8H13NO5    | N2-Acetyl-L-aminoadipate                | Amino Acid Metabolism                 | PubChem:443992   |
| 76 | 204.0898 | 12.64 | C11H12N2O2  | L-Tryptophan                            | Amino Acid Metabolism                 | PubChem:6305     |
| 77 | 216.1109 | 13.41 | C9H16N2O4   | gamma-Glutamyl-gamma-aminobutyraldehyde | Amino Acid Metabolism                 | PubChem:25246104 |
| 78 | 219.1107 | 9.50  | C9H17NO5    | Pantothenate                            | Amino Acid Metabolism                 | PubChem:6613     |
| 79 | 232.1059 | 17.34 | C9H16N2O5   | N2-Succinyl-L-ornithine                 | Amino Acid Metabolism                 | PubChem:127370   |
| 80 | 247.0692 | 18.84 | C9H13NO7    | N-Succinyl-L-glutamate                  | Amino Acid Metabolism                 | PubChem:440847   |
| 81 | 274.1277 | 17.19 | C10H18N4O5  | N2-Succinyl-L-arginine                  | Amino Acid Metabolism                 | PubChem:439968   |
| 82 | 290.1112 | 17.96 | C11H18N2O7  | N-Succinyl-LL-2,6-diaminoheptanedioate  | Amino Acid Metabolism                 | PubChem:         |
| 83 | 307.0839 | 16.16 | C10H17N3O6S | Glutathione                             | Amino Acid Metabolism                 | PubChem:124886   |
| 84 | 132.0535 | 17.75 | C4H8N2O3    | L-Asparagine                            | Amino Acid Metabolism                 | PubChem:6267     |
| 85 | 194.0804 | 10.21 | C8H10N4O2   | Caffeine                                | Biosynthesis of Secondary Metabolites | PubChem:2519     |
| 86 | 72.0576  | 6.13  | C4H8O       | Butanal                                 | Carbohydrate Metabolism               | PubChem:261      |
| 87 | 134.0579 | 9.64  | C5H10O4     | Deoxyribose                             | Carbohydrate Metabolism               | PubChem:10786    |
| 88 | 134.0215 | 15.61 | C4H6O5      | (R)-Malate                              | Carbohydrate Metabolism               | PubChem:525      |
| 89 | 104.0109 | 11.37 | C3H4O4      | 2-Hydroxy-3-oxopropanoate               | Carbohydrate Metabolism               | PubChem:22134427 |
| 90 | 88.0162  | 8.61  | C3H4O3      | Pyruvate                                | Carbohydrate Metabolism               | PubChem:107735   |
| 91 | 106.0266 | 13.78 | C3H6O4      | D-Glycerate                             | Carbohydrate Metabolism               | PubChem:5460358  |
| 92 | 118.0266 | 16.91 | C4H6O4      | Succinate                               | Carbohydrate Metabolism               | PubChem:160419   |
| 93 | 120.0423 | 12.19 | C4H8O4      | D-Erythrose                             | Carbohydrate Metabolism               | PubChem:94176    |
| 94 | 130.0266 | 13.34 | C5H6O4      | Itaconate                               | Carbohydrate Metabolism               | PubChem:5459996  |
| 95 | 132.0422 | 16.45 | C5H8O4      | 2-Acetolactate                          | Carbohydrate Metabolism               | PubChem:22       |

|     | Mass     | RT    | Formula        | Putative metabolite                            | Map                                  | PubChem ID       |
|-----|----------|-------|----------------|------------------------------------------------|--------------------------------------|------------------|
| 96  | 134.0215 | 17.73 | C4H6O5         | (S)-Malate                                     | Carbohydrate Metabolism              | PubChem:525      |
| 97  | 136.0372 | 14.33 | C4H8O5         | [FA trihydroxy(4:0)] 2,3,4-trihydroxy-butanoic | Carbohydrate Metabolism              | PubChem:439535   |
| 98  | 146.0215 | 17.23 | C5H6O5         | 2-Oxoglutarate                                 | Carbohydrate Metabolism              | PubChem:51       |
| 99  | 150.0527 | 10.52 | C5H10O5        | D-Xylulose                                     | Carbohydrate Metabolism              | PubChem:5289590  |
| 100 | 162.0528 | 15.69 | C6H10O5        | 2-Dehydro-3-deoxy-L-rhamnonate                 | Carbohydrate Metabolism              | PubChem:49852300 |
| 101 | 167.9824 | 18.98 | C3H5O6P        | Phosphoenolpyruvate                            | Carbohydrate Metabolism              | PubChem:3674425  |
| 102 | 174.0164 | 19.77 | C6H6O6         | cis-Aconitate                                  | Carbohydrate Metabolism              | PubChem:643757   |
| 103 | 176.0320 | 16.05 | C6H8O6         | D-Glucuronolactone                             | Carbohydrate Metabolism              | PubChem:219402   |
| 104 | 178.0477 | 14.47 | C6H10O6        | D-Glucono-1,5-lactone                          | Carbohydrate Metabolism              | PubChem:7027     |
| 105 | 180.0634 | 14.65 | C6H12O6        | D-Glucose                                      | Carbohydrate Metabolism              | PubChem:5793     |
| 106 | 182.0791 | 10.56 | C6H14O6        | D-Sorbitol                                     | Carbohydrate Metabolism              | PubChem:5780     |
| 107 | 192.0271 | 19.75 | C6H8O7         | Citrate                                        | Carbohydrate Metabolism              | PubChem:31348    |
| 108 | 196.0583 | 15.84 | C6H12O7        | D-Gluconic acid                                | Carbohydrate Metabolism              | PubChem:10690    |
| 109 | 200.0084 | 16.80 | C4H9O7P        | D-Erythrose 4-phosphate                        | Carbohydrate Metabolism              | PubChem:122357   |
| 110 | 230.0190 | 16.80 | C5H11O8P       | D-Ribose 5-phosphate                           | Carbohydrate Metabolism              | PubChem:439167   |
| 111 | 383.5577 | 15.18 | C21H36N7O16P3S | CoA                                            | Carbohydrate Metabolism              | PubChem:87642    |
| 112 | 468.0637 | 16.50 | C14H22N4O8P2S  | 2-(alpha-Hydroxyethyl)thiamine diphosphate     | Carbohydrate Metabolism              | PubChem:440568   |
| 113 | 185.9929 | 18.53 | C3H7O7P        | 3-Phospho-D-glycerate                          | Carbohydrate Metabolism              | PubChem:25245548 |
| 114 | 150.0527 | 10.52 | C5H10O5        | D-Ribose                                       | Carbohydrate Metabolism              | PubChem:854      |
| 115 | 335.0790 | 15.28 | C11H17N3O7S    | S-Formylglutathione                            | Energy Metabolism                    | PubChem:25246250 |
| 116 | 427.0295 | 17.11 | C10H15N5O10P2  | ADP                                            | Energy Metabolism                    | PubChem:6022     |
| 117 | 506.9960 | 18.71 | C10H16N5O13P3  | ATP                                            | Energy Metabolism                    | PubChem:5957     |
| 118 | 663.1092 | 15.99 | C21H27N7O14P2  | NAD+                                           | Energy Metabolism                    | PubChem:10897651 |
| 119 | 143.0405 | 7.01  | C6H9NOS        | 5-(2-Hydroxyethyl)-4-methylthiazole            | Metabolism of Cofactors and Vitamins | PubChem:1136     |
| 120 | 115.0269 | 16.44 | C4H5NO3        | Maleamate                                      | Metabolism of Cofactors and Vitamins | PubChem:5460391  |
| 121 | 122.0480 | 7.06  | C6H6N2O        | Nicotinamide                                   | Metabolism of Cofactors and Vitamins | PubChem:936      |
| 122 | 123.0321 | 7.79  | C6H5NO2        | Nicotinate                                     | Metabolism of Cofactors and Vitamins | PubChem:937      |
| 123 | 144.0422 | 12.41 | C6H8O4         | 2,3-Dimethylmaleate                            | Metabolism of Cofactors and Vitamins | PubChem:5459894  |
| 124 | 167.0582 | 7.96  | C8H9NO3        | Pyridoxal                                      | Metabolism of Cofactors and Vitamins | PubChem:1050     |
| 125 | 168.0897 | 12.44 | C8H12N2O2      | Pyridoxamine                                   | Metabolism of Cofactors and Vitamins | PubChem:1052     |
| 126 | 187.1207 | 11.32 | C9H17NO3       | 8-Amino-7-oxononanoate                         | Metabolism of Cofactors and Vitamins | PubChem:5460197  |
| 127 | 253.0811 | 16.22 | C9H11N5O4      | Neopterin                                      | Metabolism of Cofactors and Vitamins | PubChem:444632   |

|     | Mass     | RT    | Formula      | Putative metabolite        | Map                                  | PubChem ID       |
|-----|----------|-------|--------------|----------------------------|--------------------------------------|------------------|
| 128 | 254.0901 | 25.06 | C11H14N2O5   | N-Ribosylnicotinamide      | Metabolism of Cofactors and Vitamins | PubChem:439924   |
| 129 | 264.1046 | 20.65 | C12H16N4OS   | Thiamin                    | Metabolism of Cofactors and Vitamins | PubChem:1130     |
| 130 | 344.0709 | 16.10 | C12H17N4O4PS | Thiamin monophosphate      | Metabolism of Cofactors and Vitamins | PubChem:15942892 |
| 131 | 114.0430 | 7.81  | C4H6N2O2     | 5,6-Dihydrouracil          | Nucleotide Metabolism                | PubChem:649      |
| 132 | 268.0807 | 10.54 | C10H12N4O5   | Inosine                    | Nucleotide Metabolism                | PubChem:6021     |
| 133 | 112.0273 | 22.16 | C4H4N2O2     | Orotate(Fragment)          | Nucleotide Metabolism                | PubChem:967      |
| 134 | 111.0432 | 14.75 | C4H5N3O      | Cytosine                   | Nucleotide Metabolism                | PubChem:597      |
| 135 | 97.9674  | 19.38 | H2O4S        | Sulfate                    | Nucleotide Metabolism                | PubChem:1117     |
| 136 | 112.0273 | 8.49  | C4H4N2O2     | Uracil                     | Nucleotide Metabolism                | PubChem:1174     |
| 137 | 125.0589 | 7.70  | C5H7N3O      | 5-Methylcytosine           | Nucleotide Metabolism                | PubChem:65040    |
| 138 | 126.0430 | 7.27  | C5H6N2O2     | Thymine                    | Nucleotide Metabolism                | PubChem:1135     |
| 139 | 128.0585 | 16.29 | C5H8N2O2     | 5,6-Dihydrothymine         | Nucleotide Metabolism                | PubChem:93556    |
| 140 | 135.0545 | 9.79  | C5H5N5       | Adenine                    | Nucleotide Metabolism                | PubChem:190      |
| 141 | 136.0386 | 10.64 | C5H4N4O      | Hypoxanthine               | Nucleotide Metabolism                | PubChem:790      |
| 142 | 151.0493 | 13.20 | C5H5N5O      | Guanine                    | Nucleotide Metabolism                | PubChem:764      |
| 143 | 152.0334 | 12.44 | C5H4N4O2     | Xanthine                   | Nucleotide Metabolism                | PubChem:1188     |
| 144 | 251.1017 | 7.94  | C10H13N5O3   | Deoxyadenosine             | Nucleotide Metabolism                | PubChem:13730    |
| 145 | 305.0411 | 14.20 | C9H12N3O7P   | 2',3'-Cyclic CMP           | Nucleotide Metabolism                | PubChem:53481030 |
| 146 | 322.0567 | 14.91 | C10H15N2O8P  | dTMP                       | Nucleotide Metabolism                | PubChem:9700     |
| 147 | 323.0519 | 17.54 | C9H14N3O8P   | CMP                        | Nucleotide Metabolism                | PubChem:6131     |
| 148 | 324.0356 | 16.88 | C9H13N2O9P   | Pseudouridine 5'-phosphate | Nucleotide Metabolism                | PubChem:439424   |
| 149 | 329.0527 | 10.77 | C10H12N5O6P  | 3',5'-Cyclic AMP           | Nucleotide Metabolism                | PubChem:6076     |
| 150 | 347.0632 | 20.81 | C10H14N5O7P  | dGMP                       | Nucleotide Metabolism                | PubChem:6994968  |
| 151 | 244.0695 | 12.83 | C9H12N2O6    | Uridine                    | Nucleotide Metabolism                | PubChem:6029     |
| 152 | 188.0797 | 9.79  | C7H12N2O4    | N-Acetylglutamine          | Others                               | PubChem:25561    |
| 153 | 136.0736 | 9.90  | C5H12O4      | D-Apiitol                  | Others                               | PubChem:151720   |
| 154 | 218.0555 | 14.13 | C13H21N6O9P  | (L-Seryl)adenylate         | Others                               | PubChem:25244014 |
| 155 | 255.2562 | 5.42  | C16H33NO     | Palmiticamide              | Others                               | PubChem:69421    |
| 156 | 143.0582 | 8.16  | C6H9NO3      | Vinylacetyl glycine        | Others                               | PubChem:53477718 |
| 157 | 118.0266 | 6.46  | C4H6O4       | Methyl oxalate             | Others                               | PubChem:11120    |
| 158 | 246.0851 | 9.72  | C9H14N2O6    | 5-6-Dihydrouridine         | Others                               | PubChem:94312    |
| 159 | 129.1518 | 7.82  | C8H19N       | Octylamine                 | Others                               | PubChem:8143     |

|     | Mass     | RT    | Formula    | Putative metabolite                 | Map    | PubChem ID       |
|-----|----------|-------|------------|-------------------------------------|--------|------------------|
| 160 | 227.2249 | 5.47  | C14H29NO   | Myristic amide                      | Others | PubChem:69492    |
| 161 | 257.2355 | 6.85  | C15H31NO2  | Decanoylcholine                     | Others | PubChem:9974373  |
| 162 | 85.0891  | 11.41 | C5H11N     | Piperidine                          | Others | PubChem:849      |
| 163 | 133.0197 | 14.27 | C4H7NO2S   | L-Thiazolidine-4-carboxylate        | Others | PubChem:9934     |
| 164 | 189.0790 | 7.63  | C11H11NO2  | 3-Indolepropionic acid              | Others | PubChem:3744     |
| 165 | 243.1834 | 5.67  | C13H25NO3  | N-Undecanoylglycine                 | Others | PubChem:454092   |
| 166 | 257.1011 | 9.21  | C10H15N3O5 | 5-Methylcytidine                    | Others | PubChem:92918    |
| 167 | 215.1521 | 5.80  | C11H21NO3  | N-Nonanoylglycine                   | Others | PubChem:10176752 |
| 168 | 100.0160 | 7.02  | C4H4O3     | 2-Oxobut-3-enoate                   | Others | PubChem:9543327  |
| 169 | 116.0838 | 4.58  | C6H12O2    | 4-Hydroxyhexan-3-one                | Others | PubChem:95609    |
| 170 | 127.0633 | 26.05 | C6H9NO2    | Alpha-(Methylenecyclopropyl)glycine | Others | PubChem:25203707 |
| 171 | 132.0900 | 12.91 | C5H12N2O2  | N4-acetyl-N4-hydroxy-1-aminopropane | Others | PubChem:25201397 |
| 172 | 133.0739 | 6.98  | C5H11NO3   | N-hydroxyvaline                     | Others | PubChem:95562    |
| 173 | 133.0739 | 14.74 | C5H11NO3   | 1-deoxyxylonojirimycin              | Others | PubChem:25203271 |
| 174 | 143.0945 | 11.36 | C7H13NO2   | Stachydrine                         | Others | PubChem:554      |
| 175 | 153.9935 | 18.08 | C3H6O5S    | 3-sulfopropanoate                   | Others | PubChem:22461918 |
| 176 | 156.0189 | 13.29 | C3H9O5P    | Propane-1,2-diol 1-phosphate        | Others | PubChem:18179361 |
| 177 | 160.1211 | 17.34 | C7H16N2O2  | L-Carnitinamide                     | Others | PubChem:4633873  |
| 178 | 163.0495 | 13.66 | C6H5N5O    | Pterin                              | Others | PubChem:73000    |
| 179 | 163.0844 | 12.07 | C6H13NO4   | 1-deoxynojirimycin                  | Others | PubChem:29435    |
| 180 | 165.0652 | 13.66 | C6H7N5O    | 3-Methylguanine                     | Others | PubChem:76292    |
| 181 | 169.0849 | 7.42  | C7H11N3O2  | histidine methyl ester              | Others | PubChem:92893    |
| 182 | 169.9885 | 18.94 | C3H6O6S    | 3-Sulfolactate                      | Others | PubChem:25203561 |
| 183 | 181.0601 | 13.04 | C6H7N5O2   | 8-Hydroxy-7-methylguanine           | Others | PubChem:308075   |
| 184 | 181.0964 | 10.66 | C7H11N5O   | 6-methyltetrahydropterin            | Others | PubChem:3124     |
| 185 | 187.1208 | 4.89  | C9H17NO3   | N-Heptanoylglycine                  | Others | PubChem:10932172 |
| 186 | 187.1685 | 30.00 | C9H21N3O   | N1-Acetylspermidine                 | Others | PubChem:496      |
| 187 | 189.1113 | 18.73 | C7H15N3O3  | L-Homocitrulline                    | Others | PubChem:65072    |
| 188 | 191.0617 | 6.96  | C7H13NO3S  | N-Acetylmethionine                  | Others | PubChem:448580   |
| 189 | 197.0801 | 11.61 | C8H11N3O3  | N-Acetyl-L-histidine                | Others | PubChem:25201295 |
| 190 | 201.1363 | 4.68  | C10H19NO3  | Capryloylglycine                    | Others | PubChem:84290    |
| 191 | 216.1224 | 16.26 | C8H16N4O3  | N-acetyl-(L)-arginine               | Others | PubChem:67427    |

|     | <b>Mass</b> | <b>RT</b> | <b>Formula</b> | <b>Putative metabolite</b>           | <b>Map</b> | <b>PubChem ID</b> |
|-----|-------------|-----------|----------------|--------------------------------------|------------|-------------------|
| 192 | 229.1678    | 4.47      | C12H23NO3      | N-Decanoylglycine                    | Others     | PubChem:1712391   |
| 193 | 257.1991    | 4.22      | C14H27NO3      | N-Lauroylglycine                     | Others     | PubChem:346152    |
| 194 | 271.2147    | 4.11      | C15H29NO3      | Tridecanoylglycine                   | Others     | PubChem:45357453  |
| 195 | 278.1517    | 3.70      | C16H22O4       | 2-Ethylhexyl phthalate               | Others     | PubChem:20393     |
| 196 | 422.2346    | 3.49      | C20H38O7S      | 1,4-Bis(2-ethylhexyl) sulfosuccinate | Others     | PubChem:11339     |
| 197 | 424.0372    | 17.11     | C14H18NO10S2   | Sinalbin                             | Others     | PubChem:10621     |
| 198 | 541.0611    | 15.97     | C15H21N5O13P2  | Cyclic ADP-ribose                    | Others     | PubChem:123847    |
