# Supplementary material for: LC–MS-based absolute metabolite quantification: application to metabolic flux measurement in trypanosomes
Source: PubMed Central journal article supplement (PMC4605981; doi:10.1007/s11306-015-0827-2), 2015-07-09
Supplement: 11306_2015_827_MOESM4_ESM.pdf [file 11306_2015_827_MOESM4_ESM.pdf]

## SUPPLEMENTARY INFORMATION

### **LC-MS-based absolute metabolite quantification: Application to metabolic flux measurement in trypanosomes**

Dong-Hyun Kim<sup>1,2</sup>, Fiona Achcar<sup>1</sup>, Rainer Breitling<sup>3</sup>, Karl E. Burgess<sup>4</sup>, Michael P. Barrett<sup>1,4\*</sup>

<sup>1</sup>Wellcome Trust Centre for Molecular Parasitology, Institute of Infection, Immunity and Inflammation, College of Medical Veterinary and Life Sciences, University of Glasgow, G12 8TA, UK

<sup>2</sup>Current: Centre for Analytical Bioscience, School of Pharmacy, University of Nottingham, University Park, Nottingham, NG7 2RD, UK

<sup>3</sup>Manchester Centre of Synthetic Biology for Fine and Speciality Chemicals, Manchester Institute of Biotechnology, Faculty of Life Sciences, University of Manchester, Manchester, M1 7DN, UK.

<sup>4</sup>Glasgow Polyomics, Wolfson Wohl Cancer Research Centre, College of Medical Veterinary & Life Sciences, University of Glasgow, G61 1QH, UK

\*Address for Correspondence:

M.P. Barrett, Wellcome Trust Centre for Molecular Parasitology, Institute of Infection, Immunity and Inflammation, College of Medical Veterinary and Life Sciences, University of Glasgow, G12 8TA, UK

E-mail: Michael.Barrett@glasgow.ac.uk

Tel: +44 (0) 141 330 6904. Fax: +44 (0) 141 330 4077

| Name              | Extracellular concentration ( $\mu\text{M} \pm \text{SEM}$ ) |                  |                  |                  |                    |                    |                      |
|-------------------|--------------------------------------------------------------|------------------|------------------|------------------|--------------------|--------------------|----------------------|
|                   | 0h                                                           | 7h               | 24h              | 31h              | 48h                | 51h                | 57h                  |
| Inosine           | 1.8 $\pm$ 0.1                                                | 1.8 $\pm$ 0.1    | 1.9 $\pm$ 0.1    | 2.1 $\pm$ 0.1    | 0.9 $\pm$ 0.1      | -                  | -                    |
| L-Arginine        | 142.8 $\pm$ 6.1                                              | 142 $\pm$ 3.5    | 148.1 $\pm$ 3.1  | 168.0 $\pm$ 6.8  | 157.5 $\pm$ 3.2    | 157.9 $\pm$ 0.9    | 156.1 $\pm$ 5.8      |
| L-Asparagine      | 56.8 $\pm$ 2.8                                               | 56.9 $\pm$ 1.9   | 71.0 $\pm$ 1.9   | 84.0 $\pm$ 3.1   | 87.7 $\pm$ 2.2     | 87.5 $\pm$ 0.7     | 85.3 $\pm$ 2.8       |
| L-Aspartate       | 47.5 $\pm$ 2.4                                               | 48.7 $\pm$ 2.2   | 60.2 $\pm$ 1.7   | 71.5 $\pm$ 3.0   | 77.7 $\pm$ 2.4     | 78.9 $\pm$ 0.6     | 80.5 $\pm$ 3.1       |
| L-Glutamine       | 790.9 $\pm$ 28.8                                             | 797.3 $\pm$ 12.0 | 733.8 $\pm$ 10.4 | 785.4 $\pm$ 33.6 | 660.8 $\pm$ 14.8   | 624.1 $\pm$ 9.9    | 562.0 $\pm$ 15.0     |
| L-Histidine       | 22.9 $\pm$ 1.1                                               | 23.4 $\pm$ 0.8   | 27.6 $\pm$ 0.8   | 31.7 $\pm$ 1.3   | 32.8 $\pm$ 1.1     | 31.9 $\pm$ 0.3     | 32.0 $\pm$ 0.7       |
| L-Lysine          | 192.1 $\pm$ 7.2                                              | 192.8 $\pm$ 4.5  | 203.9 $\pm$ 3.3  | 227.6 $\pm$ 9.0  | 217.5 $\pm$ 4.4    | 214.4 $\pm$ 1.2    | 210.9 $\pm$ 6.6      |
| L-Methionine      | 22.5 $\pm$ 1.0                                               | 22.9 $\pm$ 0.7   | 25.9 $\pm$ 0.5   | 30.2 $\pm$ 1.2   | 26.5 $\pm$ 0.4     | 24.6 $\pm$ 0.7     | 17.9 $\pm$ 0.6       |
| L-Proline         | 59.3 $\pm$ 2.4                                               | 59.3 $\pm$ 1.8   | 72.7 $\pm$ 1.4   | 86.6 $\pm$ 4.4   | 85.2 $\pm$ 1.8     | 85.0 $\pm$ 0.7     | 83.8 $\pm$ 3.5       |
| L-Threonine       | 62.6 $\pm$ 2.8                                               | 63.6 $\pm$ 2.2   | 75.1 $\pm$ 1.7   | 86.9 $\pm$ 4.1   | 80.7 $\pm$ 1.4     | 78.1 $\pm$ 1.2     | 67.6 $\pm$ 1.8       |
| L-Tryptophan      | 10.2 $\pm$ 1.1                                               | 8.8 $\pm$ 0.3    | 10.1 $\pm$ 0.3   | 12.1 $\pm$ 0.8   | 7.6 $\pm$ 0.3      | 5.9 $\pm$ 0.5      | 0.8 $\pm$ 0.1        |
| L-Valine          | 87.2 $\pm$ 3.6                                               | 87.6 $\pm$ 3.5   | 108.2 $\pm$ 3.9  | 126.7 $\pm$ 3.8  | 114.9 $\pm$ 2.9    | 108.5 $\pm$ 1.4    | 88.0 $\pm$ 2.1       |
| Pyruvate          | 61.7 $\pm$ 2.0                                               | 92.5 $\pm$ 7.2   | 240.2 $\pm$ 30.3 | 652.4 $\pm$ 56.8 | 5467.9 $\pm$ 472.0 | 7740.3 $\pm$ 493.5 | 15683.9 $\pm$ 1437.6 |
| L-Glutamate       | 79.3 $\pm$ 4.2                                               | 80.3 $\pm$ 3.0   | 93.4 $\pm$ 2.5   | 113.7 $\pm$ 5.3  | 131.2 $\pm$ 5.2    | 137.8 $\pm$ 1.9    | 151.8 $\pm$ 7.4      |
| cis-Aconitate     | 2.0 $\pm$ 0.1                                                | 2.0 $\pm$ 0.0    | 2.0 $\pm$ 0.0    | 2.1 $\pm$ 0.1    | 2.0 $\pm$ 0.0      | 2.0 $\pm$ 0.1      | 2.1 $\pm$ 0.1        |
| Xanthine          | 185.7 $\pm$ 6.9                                              | 188.4 $\pm$ 4.0  | 196.7 $\pm$ 3.2  | 225.8 $\pm$ 9.0  | 240.9 $\pm$ 6.3    | 251.5 $\pm$ 2.7    | 269.2 $\pm$ 12.5     |
| L-Homoserine      | 23.9 $\pm$ 1.2                                               | 24.3 $\pm$ 0.9   | 29.3 $\pm$ 0.8   | 34.6 $\pm$ 1.9   | 31.8 $\pm$ 0.6     | 30.6 $\pm$ 0.5     | 26.1 $\pm$ 0.8       |
| L-Tyrosine        | 89.1 $\pm$ 4.0                                               | 89.2 $\pm$ 3.3   | 111.1 $\pm$ 2.2  | 131.1 $\pm$ 5.7  | 120.9 $\pm$ 1.8    | 113.8 $\pm$ 1.7    | 80.8 $\pm$ 2.5       |
| L-Ornithine       | 15.9 $\pm$ 0.7                                               | 16.8 $\pm$ 1.1   | 16.6 $\pm$ 0.7   | 18.1 $\pm$ 1.0   | 17.1 $\pm$ 0.7     | 16.7 $\pm$ 0.2     | 16.0 $\pm$ 0.6       |
| Pantothenate      | 1.6 $\pm$ 0.1                                                | 1.6 $\pm$ 0.0    | 1.5 $\pm$ 0.0    | 1.7 $\pm$ 0.1    | 1.6 $\pm$ 0.1      | 1.7 $\pm$ 0.0      | 1.7 $\pm$ 0.1        |
| L-Alanine         | 356.3 $\pm$ 52.9                                             | 331.1 $\pm$ 59.7 | 333.6 $\pm$ 22.6 | 392.2 $\pm$ 37.9 | 540.9 $\pm$ 22.3   | 606.7 $\pm$ 40.1   | 761.4 $\pm$ 84.5     |
| 2-Oxoglutarate    | 0.8 $\pm$ 0.1                                                | 0.9 $\pm$ 0.1    | 1.2 $\pm$ 0.1    | 1.9 $\pm$ 0.1    | 13.0 $\pm$ 1.3     | 18.8 $\pm$ 1.2     | 39.9 $\pm$ 3.5       |
| Succinate         | 2.8 $\pm$ 0.1                                                | 2.9 $\pm$ 0.1    | 2.8 $\pm$ 0.0    | 3.3 $\pm$ 0.1    | 5.1 $\pm$ 0.3      | 6.3 $\pm$ 0.3      | 11.5 $\pm$ 1.1       |
| Citrate           | 212.8 $\pm$ 8.4                                              | 214.5 $\pm$ 4.6  | 207.1 $\pm$ 5.2  | 231.2 $\pm$ 10.9 | 216.5 $\pm$ 5.4    | 216.3 $\pm$ 5.1    | 223.4 $\pm$ 8.8      |
| Hypoxanthine      | 11.9 $\pm$ 0.7                                               | 11.7 $\pm$ 0.5   | 12.5 $\pm$ 0.4   | 14.3 $\pm$ 0.5   | 6.1 $\pm$ 0.4      | 3.4 $\pm$ 0.5      | -                    |
| O-Acetyl-L-serine | 1.0 $\pm$ 0.1                                                | 1.1 $\pm$ 0.1    | 1.1 $\pm$ 0.1    | 1.2 $\pm$ 0.1    | 1.2 $\pm$ 0.1      | 1.2 $\pm$ 0.0      | 1.3 $\pm$ 0.1        |
| Glycerate         | 1.8 $\pm$ 0.1                                                | 1.9 $\pm$ 0.0    | 1.9 $\pm$ 0.0    | 1.9 $\pm$ 0.0    | 2.5 $\pm$ 0.0      | 2.7 $\pm$ 0.1      | 3.5 $\pm$ 0.2        |
| L-Isoleucine      | 132.3 $\pm$ 6.0                                              | 132.2 $\pm$ 4.8  | 168.9 $\pm$ 4.5  | 189.6 $\pm$ 6.5  | 128.9 $\pm$ 2.8    | 107.0 $\pm$ 3.9    | 61.4 $\pm$ 2.0       |
| Glycine           | 143.4 $\pm$ 8.2                                              | 146.9 $\pm$ 3.8  | 161.7 $\pm$ 3.0  | 183.3 $\pm$ 6.1  | 186.8 $\pm$ 3.6    | 186.9 $\pm$ 1.5    | 195.5 $\pm$ 7.2      |
| L-Phenylalanine   | 55.4 $\pm$ 13.4                                              | 43.4 $\pm$ 4.3   | 78.8 $\pm$ 21.8  | 56.1 $\pm$ 3.3   | 68.3 $\pm$ 33.4    | 42.6 $\pm$ 10.7    | 2.9 $\pm$ 0.7        |

---

| <b>Name</b>  | <b>Extracellular concentration (<math>\mu\text{M} \pm \text{SEM}</math>)</b> |                 |                 |                 |                 |                 |                 |
|--------------|------------------------------------------------------------------------------|-----------------|-----------------|-----------------|-----------------|-----------------|-----------------|
|              | <b>0h</b>                                                                    | <b>7h</b>       | <b>24h</b>      | <b>31h</b>      | <b>48h</b>      | <b>51h</b>      | <b>57h</b>      |
| L-Citrulline | $4.0 \pm 0.2$                                                                | $4.1 \pm 0.1$   | $3.9 \pm 0.1$   | $4.3 \pm 0.2$   | $4.0 \pm 0.1$   | $4.1 \pm 0.0$   | $4.2 \pm 0.2$   |
| L-Serine     | $118.5 \pm 4.0$                                                              | $121.7 \pm 4.1$ | $133.3 \pm 2.9$ | $145.5 \pm 4.9$ | $146.5 \pm 2.3$ | $146.0 \pm 2.9$ | $148.0 \pm 5.1$ |

---
