# Supplementary material for: LC–MS-based absolute metabolite quantification: application to metabolic flux measurement in trypanosomes
Source: PubMed Central journal article supplement (PMC4605981; doi:10.1007/s11306-015-0827-2), 2015-07-09

## SUPPLEMENTARY INFORMATION

### **LC-MS-based absolute metabolite quantification: Application to metabolic flux measurement in trypanosomes**

Dong-Hyun Kim<sup>1,2</sup>, Fiona Achcar<sup>1</sup>, Rainer Breitling<sup>3</sup>, Karl E. Burgess<sup>4</sup>, Michael P. Barrett<sup>1,4\*</sup>

<sup>1</sup>Wellcome Trust Centre for Molecular Parasitology, Institute of Infection, Immunity and Inflammation, College of Medical Veterinary and Life Sciences, University of Glasgow, G12 8TA, UK

<sup>2</sup>Current: Centre for Analytical Bioscience, School of Pharmacy, University of Nottingham, University Park, Nottingham, NG7 2RD, UK

<sup>3</sup>Manchester Centre of Synthetic Biology for Fine and Speciality Chemicals, Manchester Institute of Biotechnology, Faculty of Life Sciences, University of Manchester, Manchester, M1 7DN, UK.

<sup>4</sup>Glasgow Polyomics, Wolfson Wohl Cancer Research Centre, College of Medical Veterinary & Life Sciences, University of Glasgow, G61 1QH, UK

\*Address for Correspondence:

M.P. Barrett, Wellcome Trust Centre for Molecular Parasitology, Institute of Infection, Immunity and Inflammation, College of Medical Veterinary and Life Sciences, University of Glasgow, G12 8TA, UK

E-mail: Michael.Barrett@glasgow.ac.uk

Tel: +44 (0) 141 330 6904. Fax: +44 (0) 141 330 4077

CMM + Haanstra 2012 ●  
HMI9 × Haanstra 2012 ○

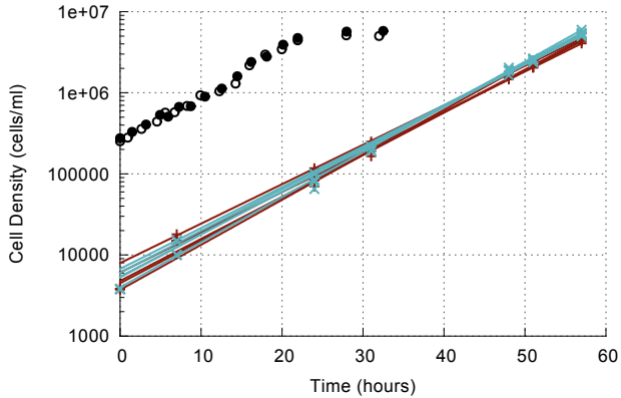

Supplement: 11306_2015_827_MOESM6_ESM.pdf [file 11306_2015_827_MOESM6_ESM.pdf]
